# Supplementary material for: Mapping the optoelectronic property space of small aromatic molecules
Source: PubMed Central journal article supplement (PMC9814262; doi:10.1038/s42004-020-0256-7), 2020-02-05
Supplement: 42004_2020_256_MOESM1_ESM.pdf [file 42004_2020_256_MOESM1_ESM.pdf]

Supplementary information for  
**Mapping the optoelectronic property space of small aromatic  
molecules**

Liam Wilbraham,<sup>1</sup> Denisa Smalji,<sup>1</sup> Isabelle Heath- Apostolopoulos,<sup>1</sup>  
Martijn A. Zwijnenburg<sup>1,\*</sup>

Department of Chemistry, University College London, 20 Gordon Street,  
London WC1H 0AJ, UK

\* E-mail: [m.zwijnenburg@ucl.ac.uk](mailto:m.zwijnenburg@ucl.ac.uk)

## Supplementary figures

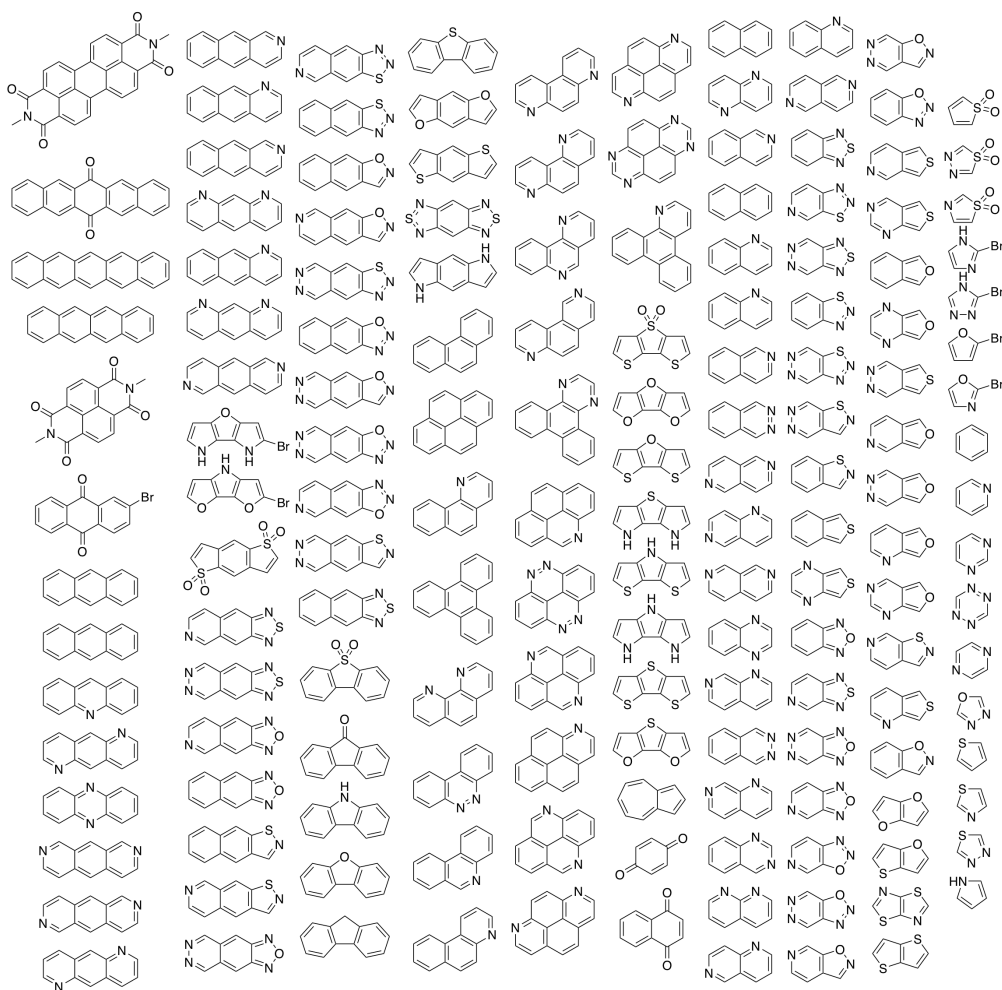

**Supplementary Fig. 1** All the molecular skeletons included in the study.

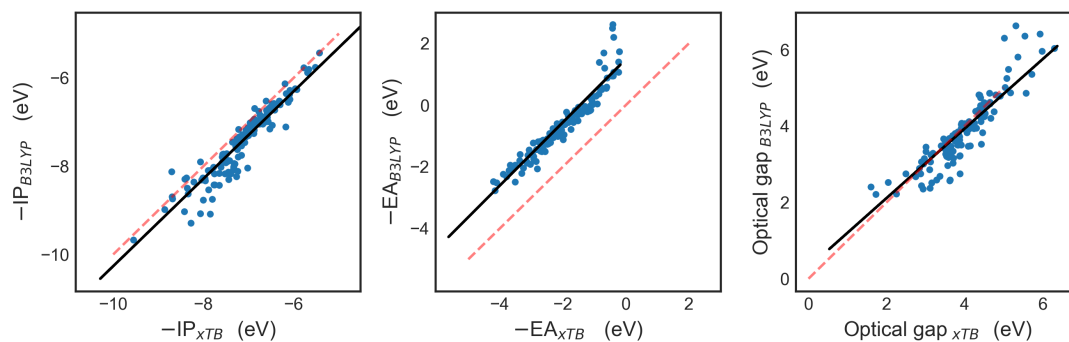

**Supplementary Fig. 2** Correlation between  $-IP$  (left),  $-EA$  (centre) and optical gap values (right) as calculated with (IPEA/sTDA)-xTB and (TD-)B3LYP/DZP for the molecular skeletons. In every panel the black line is the line of best fit used to calibrate the (IPEA/sTDA)-xTB to the (TD-)B3LYP data while the red dashed line is the  $x = y$  line.

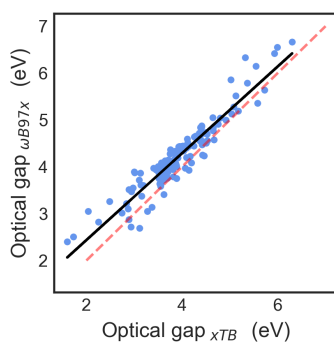

**Supplementary Fig. 3** Comparison of the  $\Delta_0$  values calculated for the molecular skeletons using sTDA-xTB and  $\omega B97x/aug-cc-pVTZ$ .

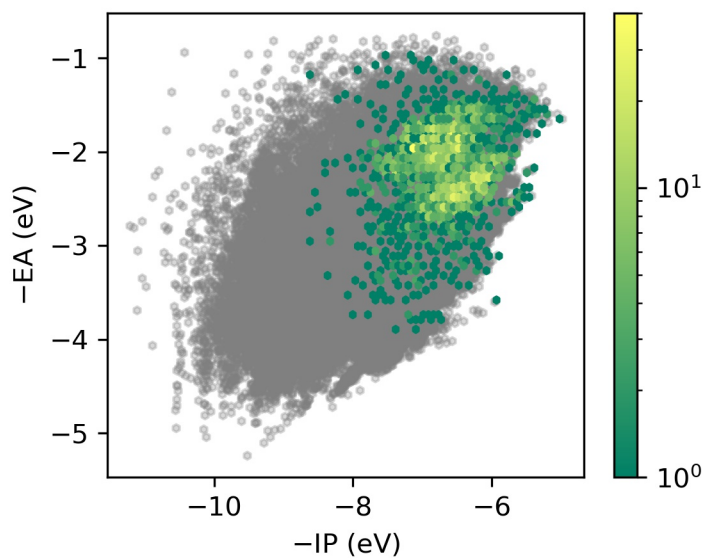

**Supplementary Fig. 4** 2D histogram of the property space spanned by -IP and -EA for molecules functionalised with one or two NH<sub>2</sub> groups.

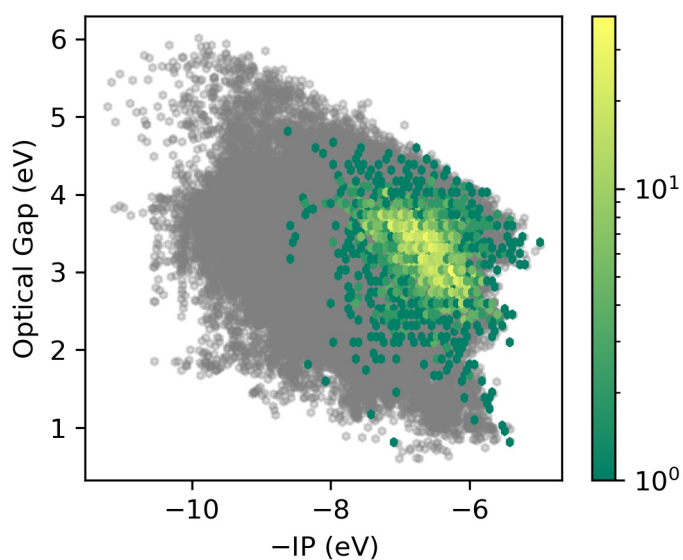

**Supplementary Fig. 5** 2D histogram of the property space spanned by -IP and the optical gap for molecules functionalised with one or two NH<sub>2</sub> groups.

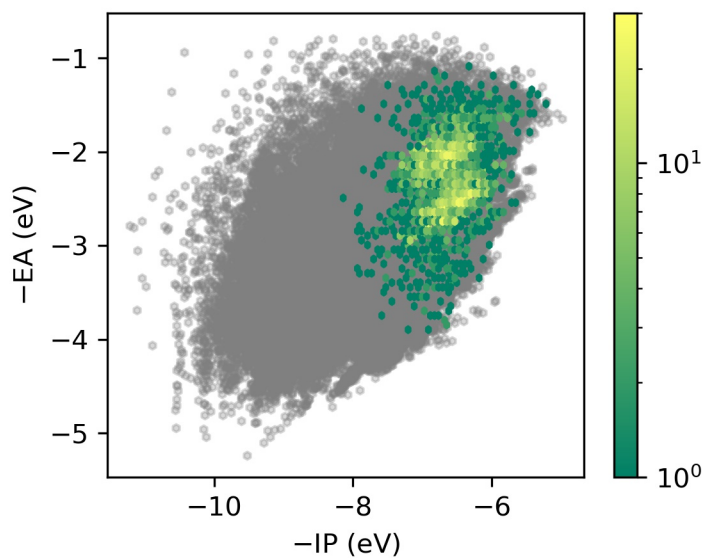

**Supplementary Fig. 6** 2D histogram of the property space spanned by -IP and -EA for molecules functionalised with one or two  $\text{N}(\text{CH}_3)_2$  groups.

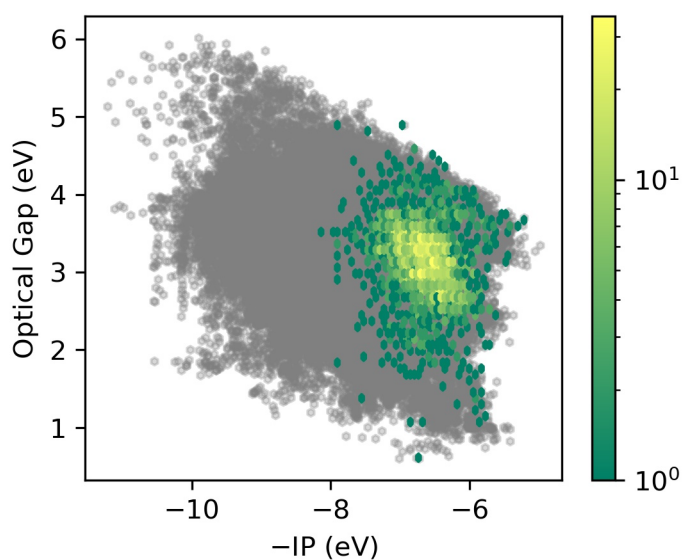

**Supplementary Fig. 7** 2D histogram of the property space spanned by -IP and the optical gap for molecules functionalised with one or two  $\text{N}(\text{CH}_3)_2$  groups.

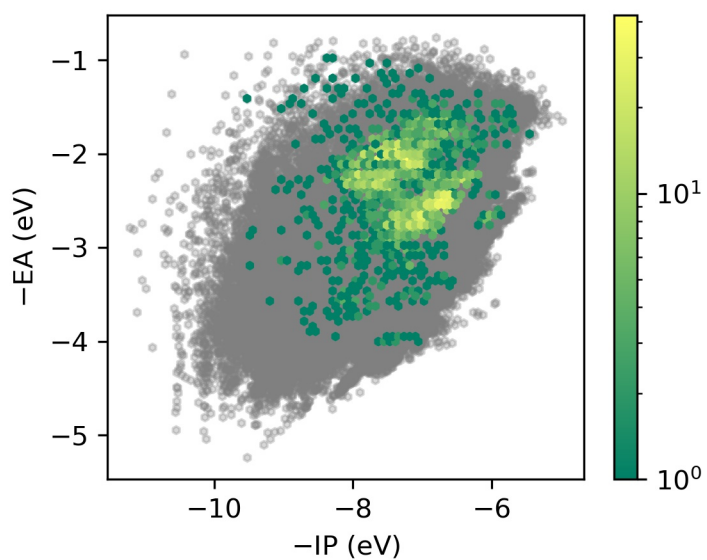

**Supplementary Fig. 8** 2D histogram of the property space spanned by  $-IP$  and  $-EA$  for molecules functionalised with one or two OH groups.

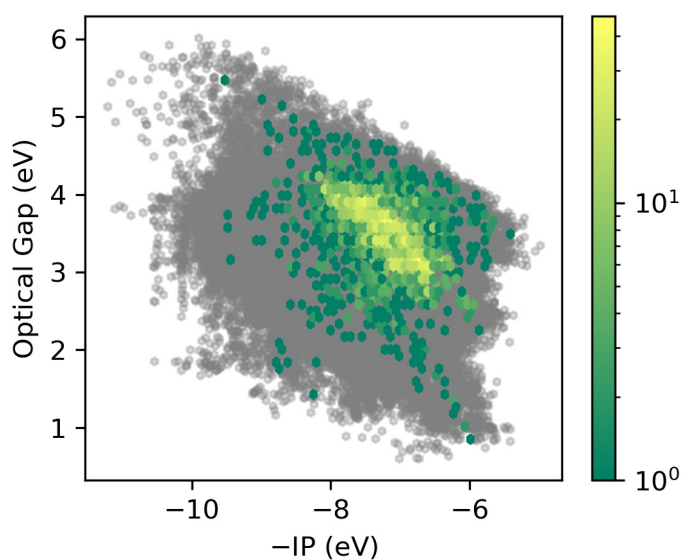

**Supplementary Fig. 9** 2D histogram of the property space spanned by  $-IP$  and the optical gap for molecules functionalised with one or two OH groups.

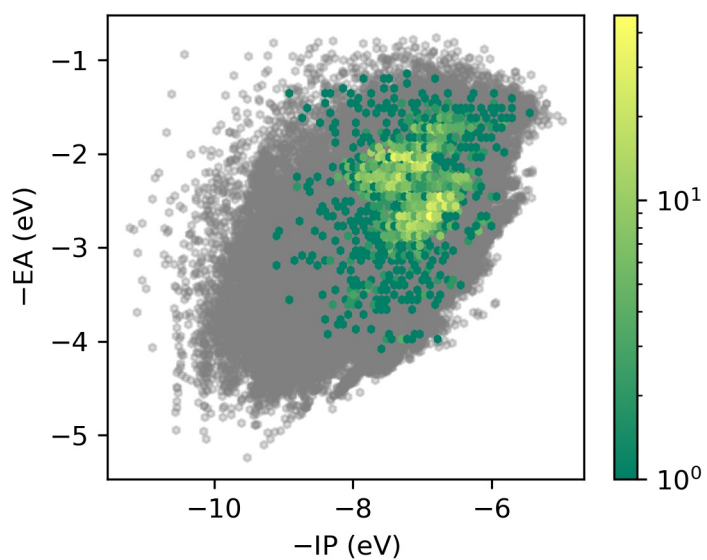

**Supplementary Fig. 10** 2D histogram of the property space spanned by -IP and -EA for molecules functionalised with one or two OCH<sub>3</sub> groups.

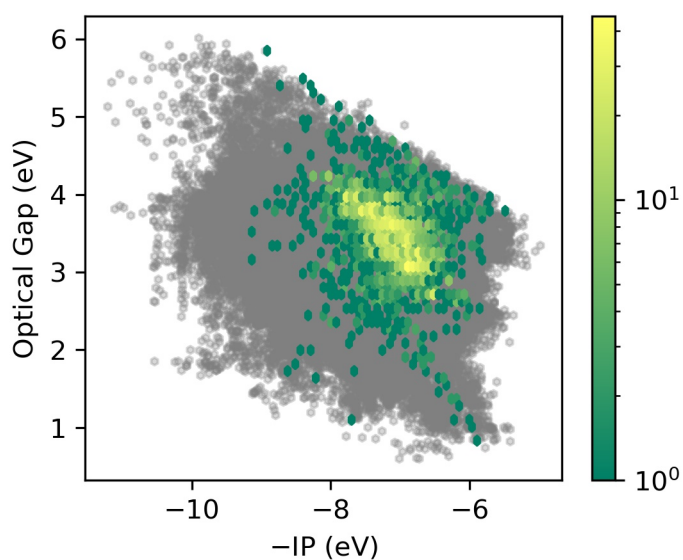

**Supplementary Fig. 11** 2D histogram of the property space spanned by -IP and the optical gap for molecules functionalised with one or two OCH<sub>3</sub> groups.

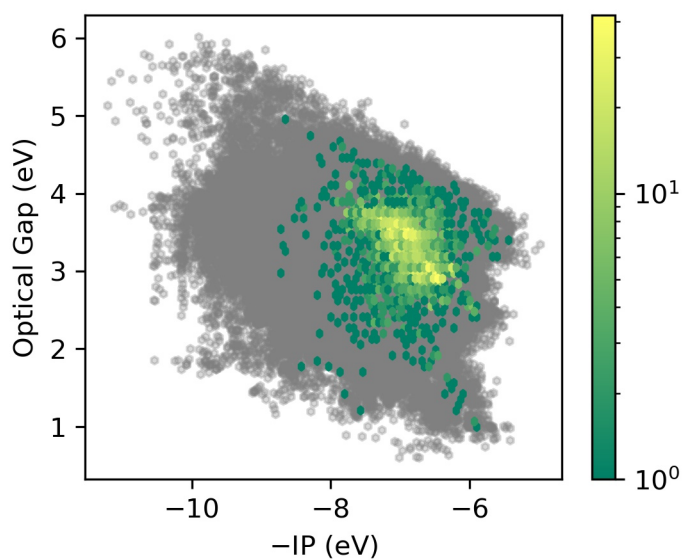

**Supplementary Fig. 12** 2D histogram of the property space spanned by -IP and -EA for molecules functionalised with one or two SH groups.

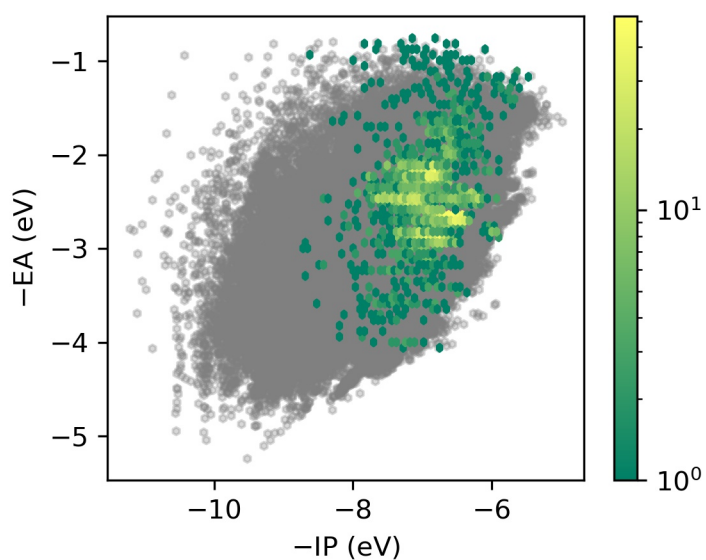

**Supplementary Fig. 13** 2D histogram of the property space spanned by -IP and the optical gap for molecules functionalised with one or two SH groups.



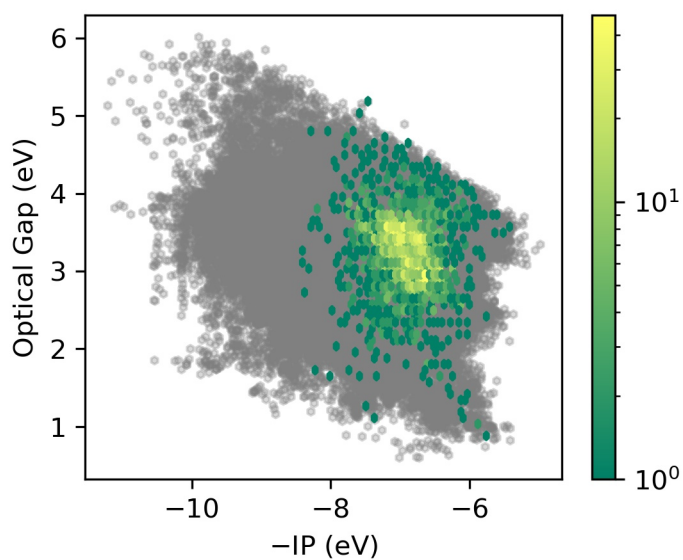

**Supplementary Fig. 14** 2D histogram of the property space spanned by -IP and -EA for molecules functionalised with one or two SCH<sub>3</sub> groups.

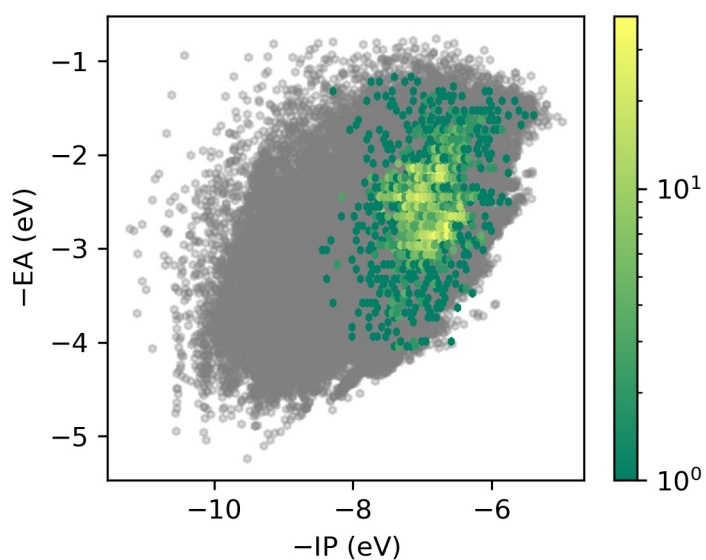

**Supplementary Fig. 15** 2D histogram of the property space spanned by -IP and the optical gap for molecules functionalised with one or two SCH<sub>3</sub> groups.

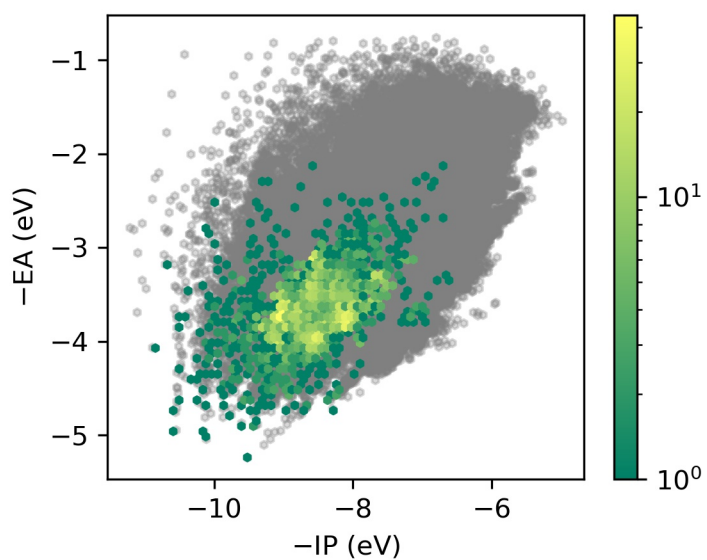

**Supplementary Fig. 16** 2D histogram of the property space spanned by -IP and -EA for molecules functionalised with one or two NO<sub>2</sub> groups.

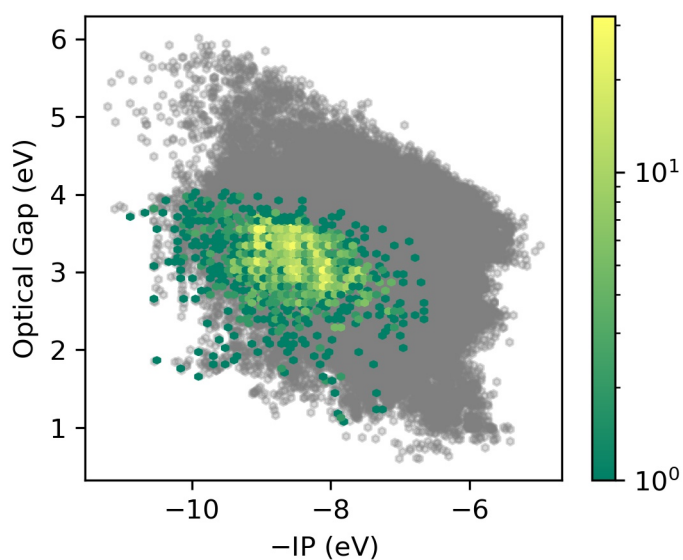

**Supplementary Fig. 17** 2D histogram of the property space spanned by -IP and the optical gap for molecules functionalised with one or two NO<sub>2</sub> groups.

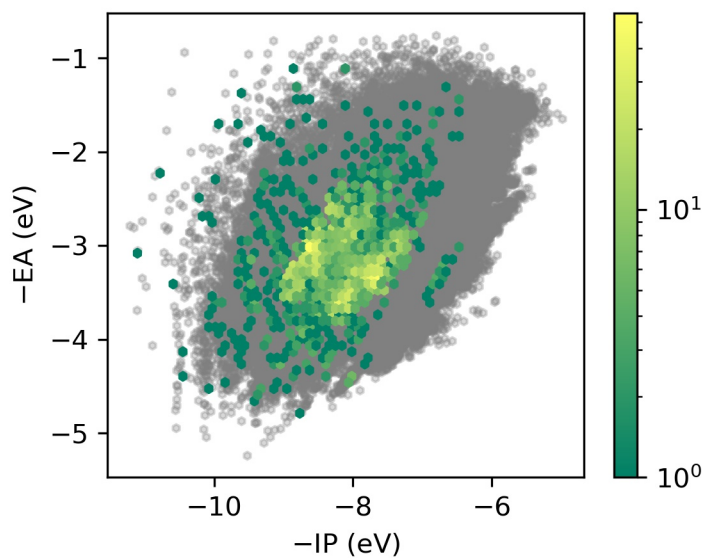

**Supplementary Fig. 18** 2D histogram of the property space spanned by -IP and -EA for molecules functionalised with one or two CN groups.

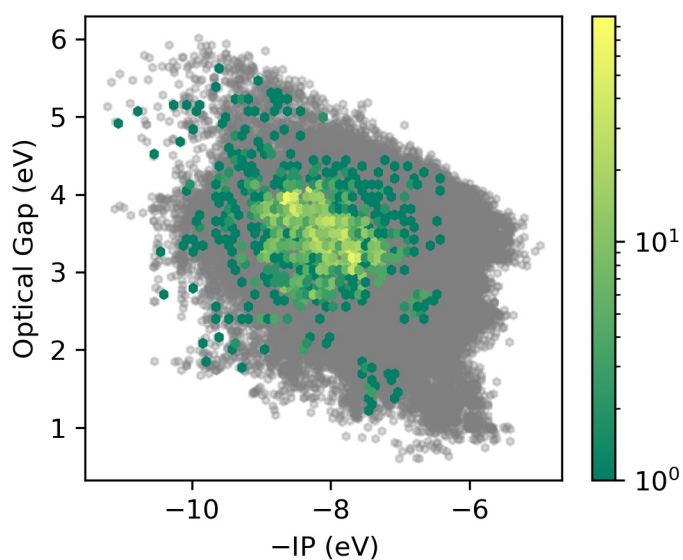

**Supplementary Fig. 19** 2D histogram of the property space spanned by -IP and the optical gap for molecules functionalised with one or two CN groups.

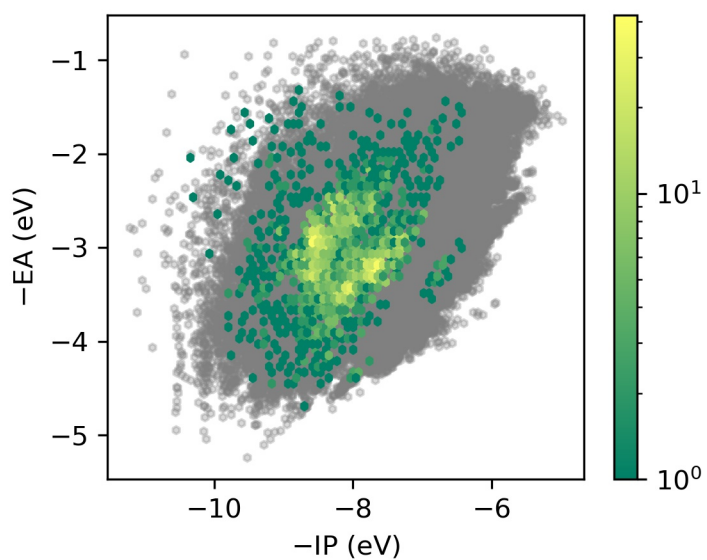

**Supplementary Fig. 20** 2D histogram of the property space spanned by  $-\text{IP}$  and  $-\text{EA}$  for molecules functionalised with one or two  $\text{SO}_3\text{H}$  groups.

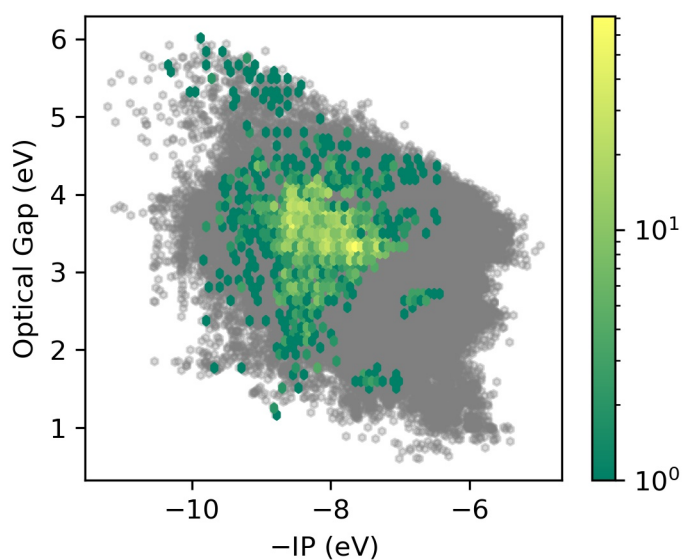

**Supplementary Fig. 21** 2D histogram of the property space spanned by  $-\text{IP}$  and the optical gap for molecules functionalised with one or two  $\text{SO}_3\text{H}$  groups.

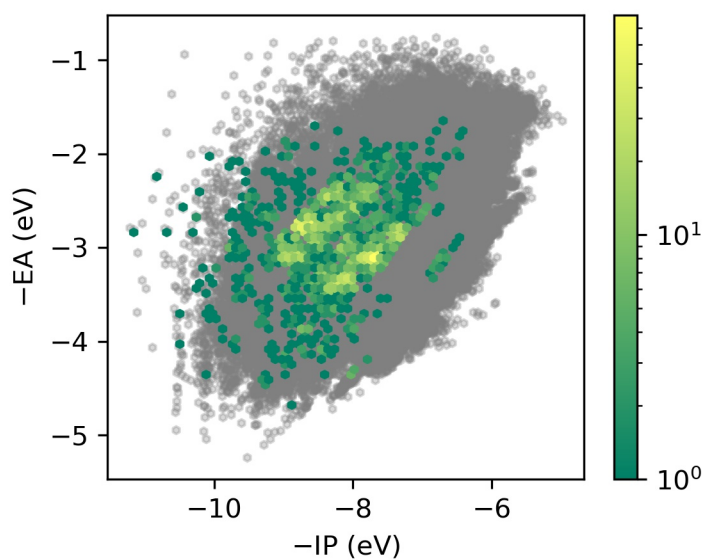

**Supplementary Fig. 22** 2D histogram of the property space spanned by -IP and -EA for molecules functionalised with one or two CF<sub>3</sub> groups.

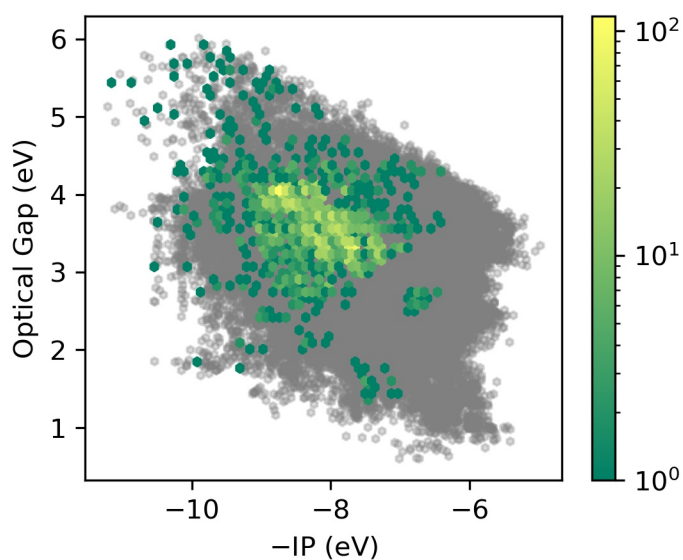

**Supplementary Fig. 23** 2D histogram of the property space spanned by -IP and the optical gap for molecules functionalised with one or two CF<sub>3</sub> groups.

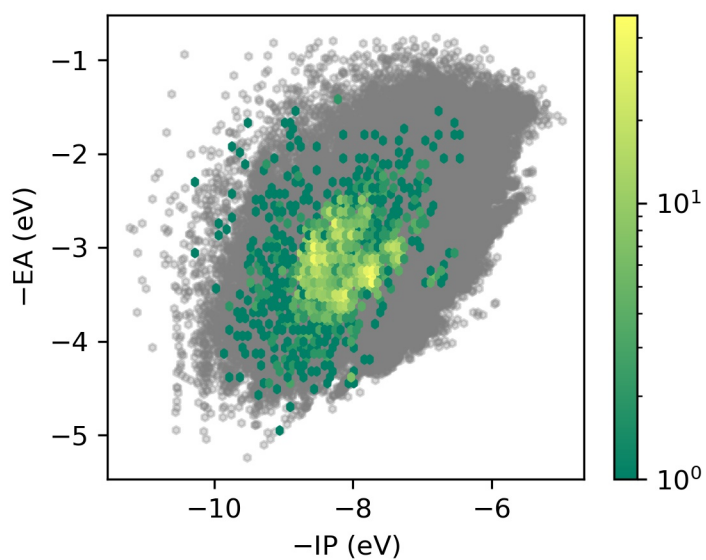

**Supplementary Fig. 24** 2D histogram of the property space spanned by  $-IP$  and  $-EA$  for molecules functionalised with one or two COOH groups.

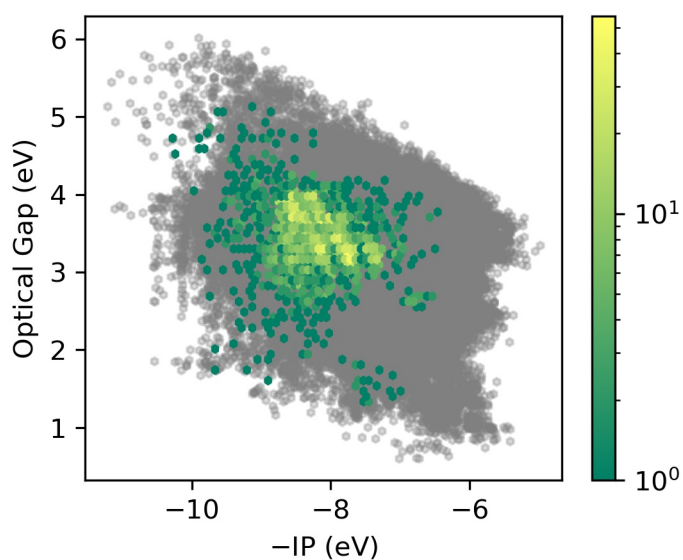

**Supplementary Fig. 25** 2D histogram of the property space spanned by  $-IP$  and the optical gap for molecules functionalised with one or two COOH groups.

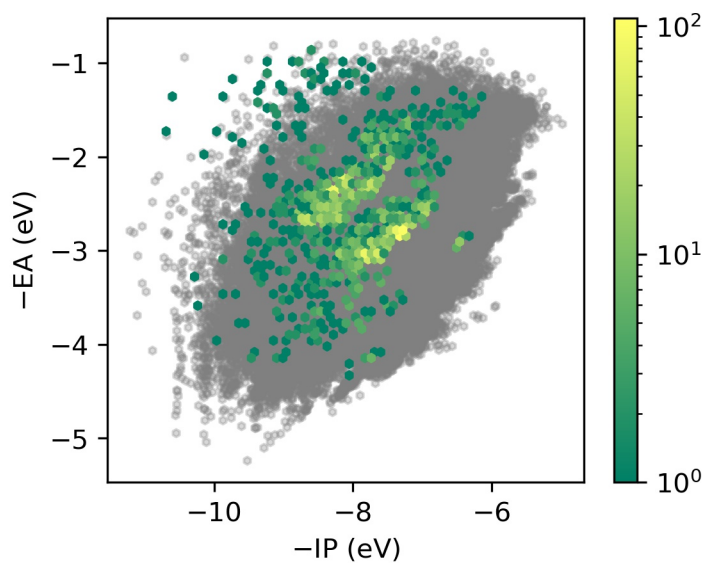

**Supplementary Fig. 26** 2D histogram of the property space spanned by  $-IP$  and  $-EA$  for molecules functionalised with one or two fluorine atoms.

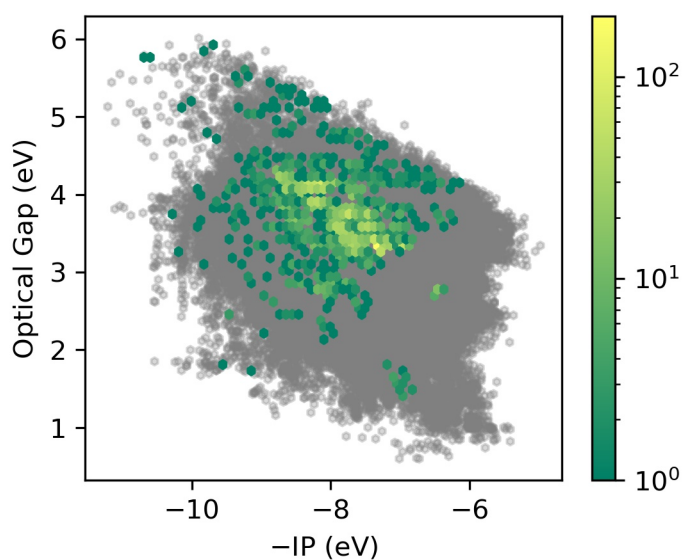

**Supplementary Fig. 27** 2D histogram of the property space spanned by  $-IP$  and the optical gap for molecules functionalised with one or two fluorine atoms.

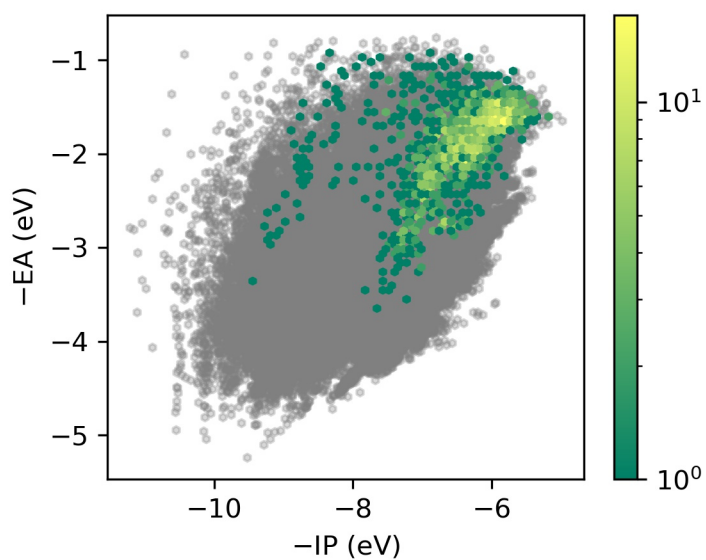

**Supplementary Fig. 28** 2D histogram of the property space spanned by  $-IP$  and  $-EA$  for molecules containing  $[nH](:[cH]):[cH]$ .

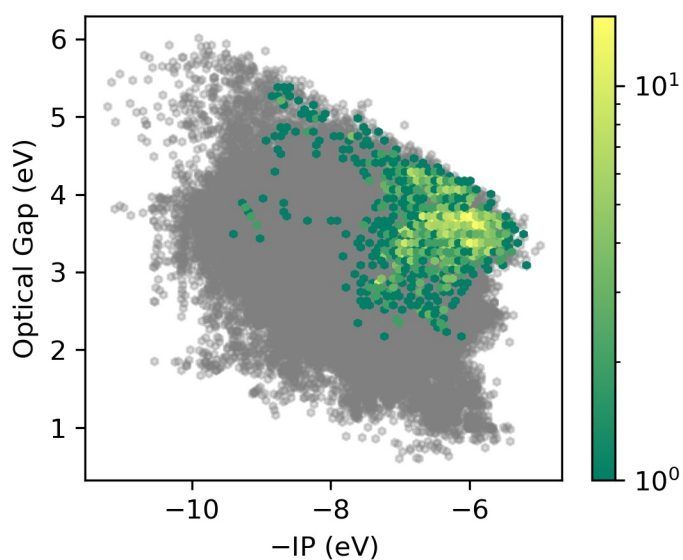

**Supplementary Fig. 29** 2D histogram of the property space spanned by  $-IP$  and the optical gap for molecules containing  $[nH](:[cH]):[cH]$ .



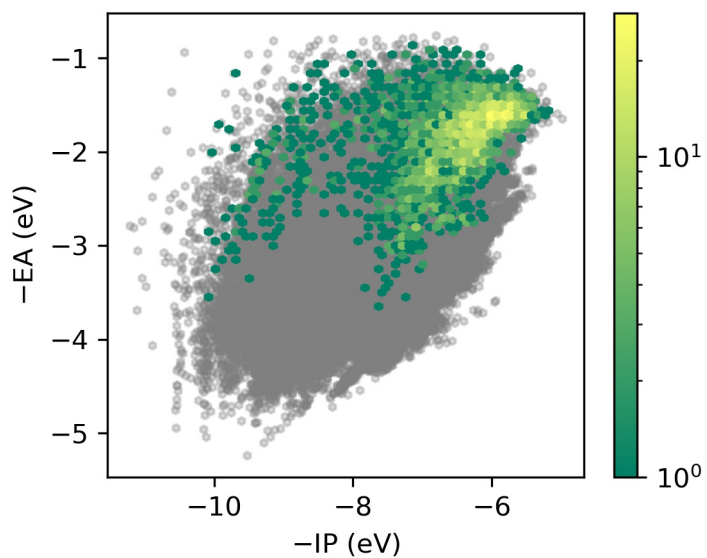

**Supplementary Fig. 30** 2D histogram of the property space spanned by -IP and -EA for molecules containing [nH](:[cH]):[c].

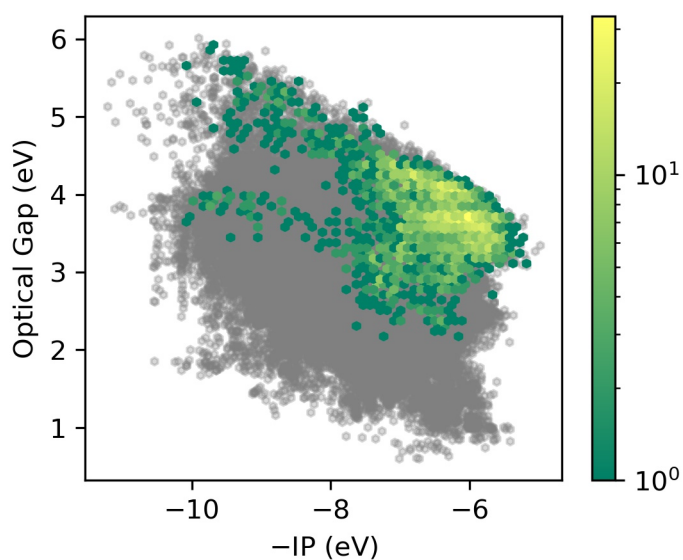

**Supplementary Fig. 31** 2D histogram of the property space spanned by -IP and the optical gap for molecules containing [nH](:[cH]):[c].

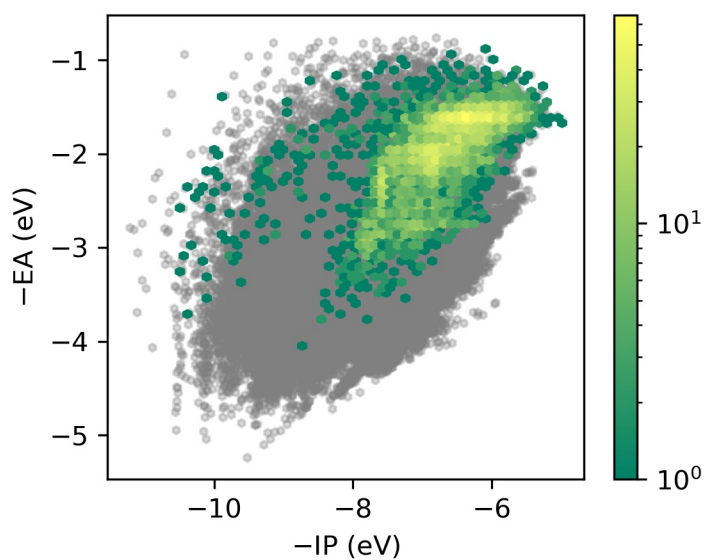

**Supplementary Fig. 32** 2D histogram of the property space spanned by -IP and -EA for molecules containing [nH](:[c]):[c].

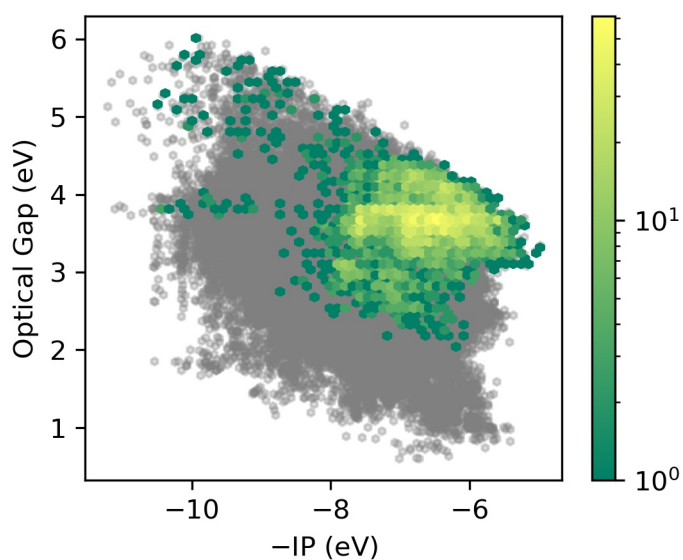

**Supplementary Fig. 33** 2D histogram of the property space spanned by -IP and the optical gap for molecules containing [nH](:[c]):[c].

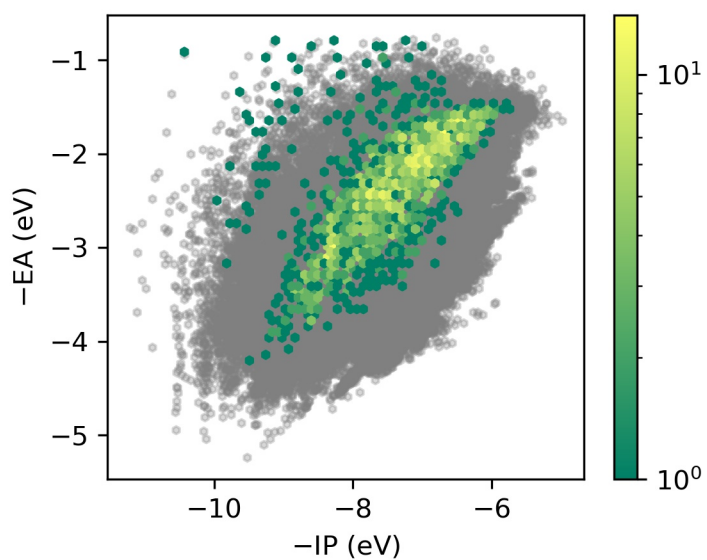

**Supplementary Fig. 34** 2D histogram of the property space spanned by -IP and -EA for molecules containing [o](:[cH]):[cH].

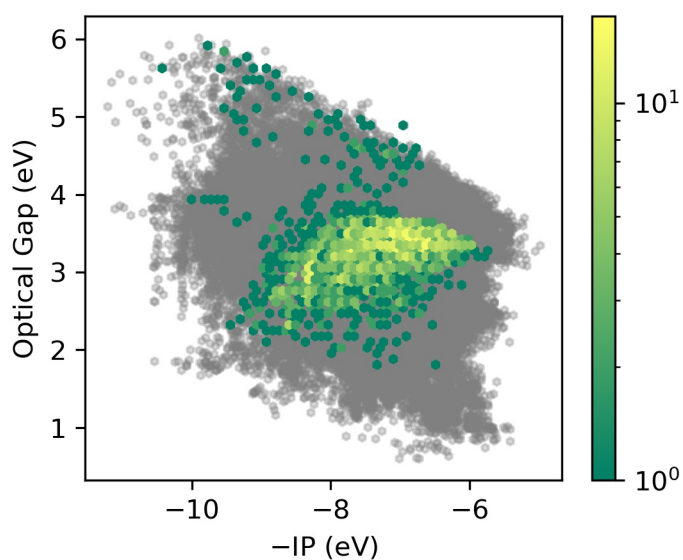

**Supplementary Fig. 35** 2D histogram of the property space spanned by -IP and the optical gap for molecules containing [o](:[cH]):[cH].

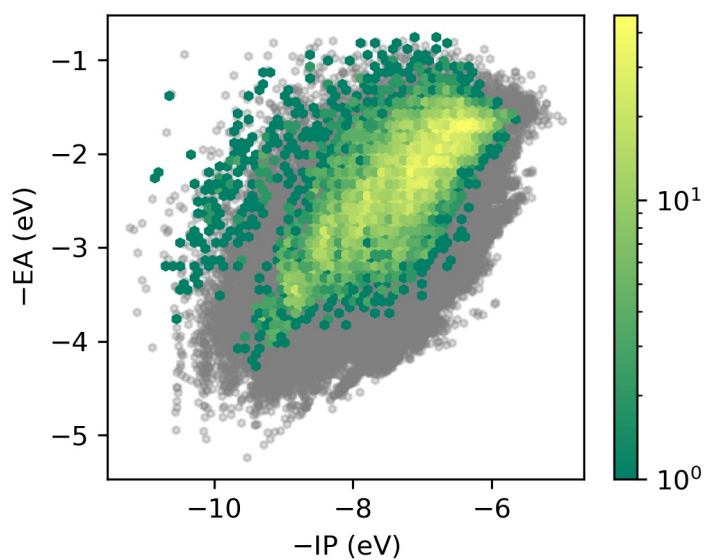

**Supplementary Fig. 36** 2D histogram of the property space spanned by -IP and -EA for molecules containing [o](:[cH]):[c].

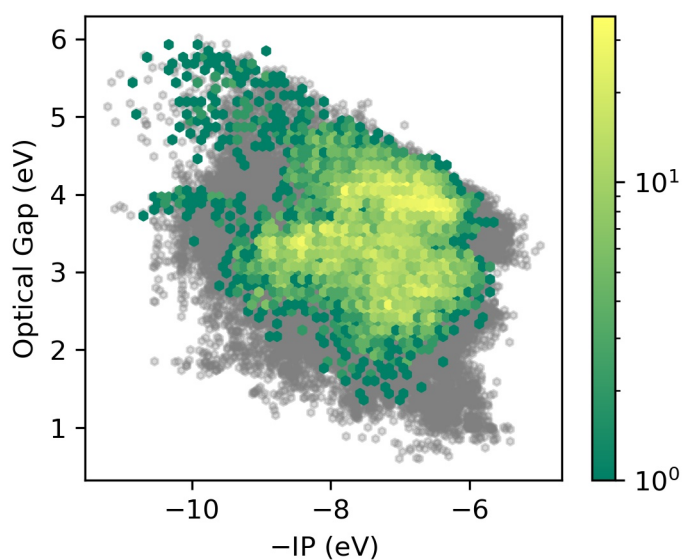

**Supplementary Fig. 37** 2D histogram of the property space spanned by -IP and the optical gap for molecules containing [o](:[cH]):[c].

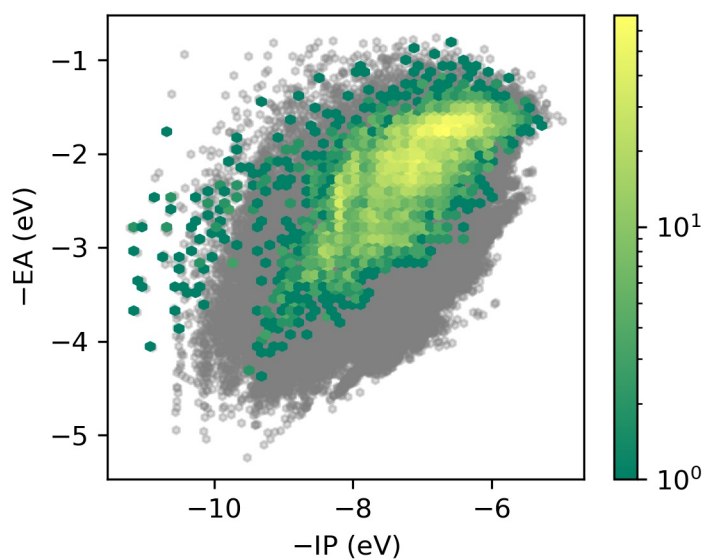

**Supplementary Fig. 38** 2D histogram of the property space spanned by -IP and -EA for molecules containing [o](:[c]):[c].

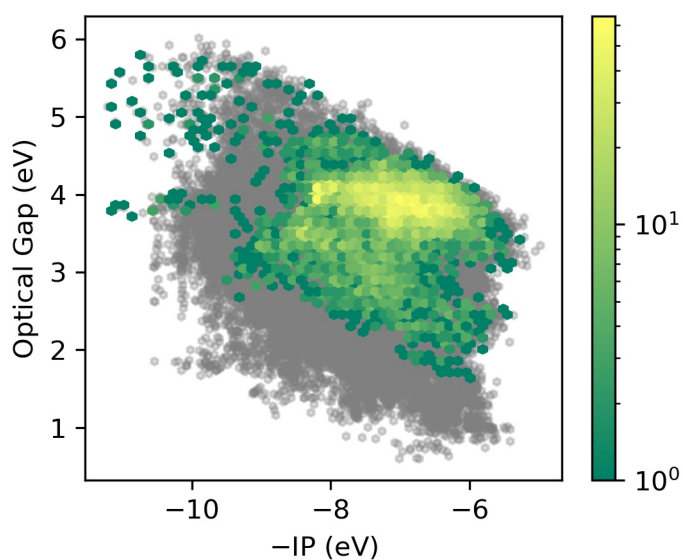

**Supplementary Fig. 39** 2D histogram of the property space spanned by -IP and the optical gap for molecules containing [o](:[c]):[c].

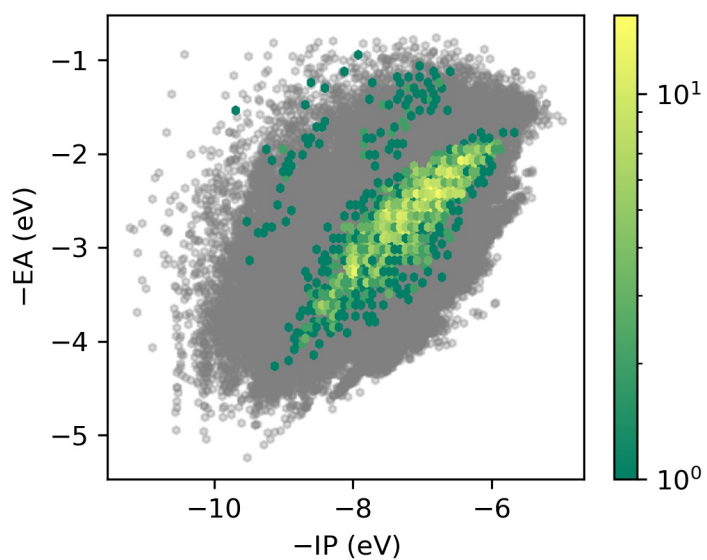

**Supplementary Fig. 40** 2D histogram of the property space spanned by -IP and -EA for molecules containing [s](:[cH]):[cH].

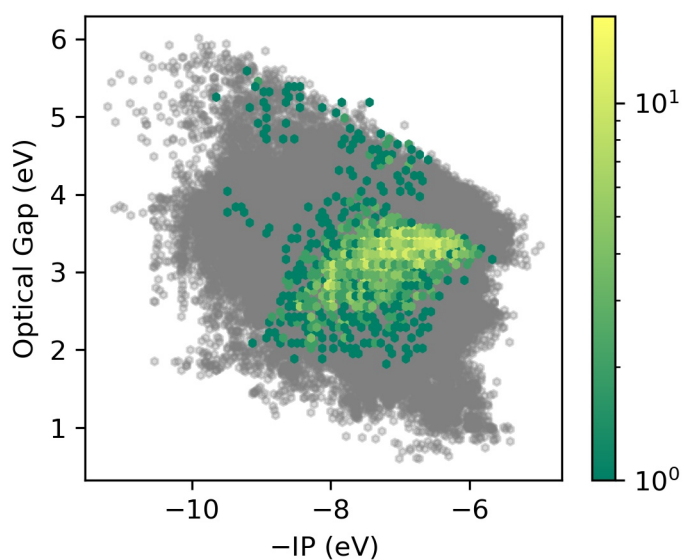

**Supplementary Fig. 41** 2D histogram of the property space spanned by -IP and the optical gap for molecules containing [s](:[cH]):[cH].

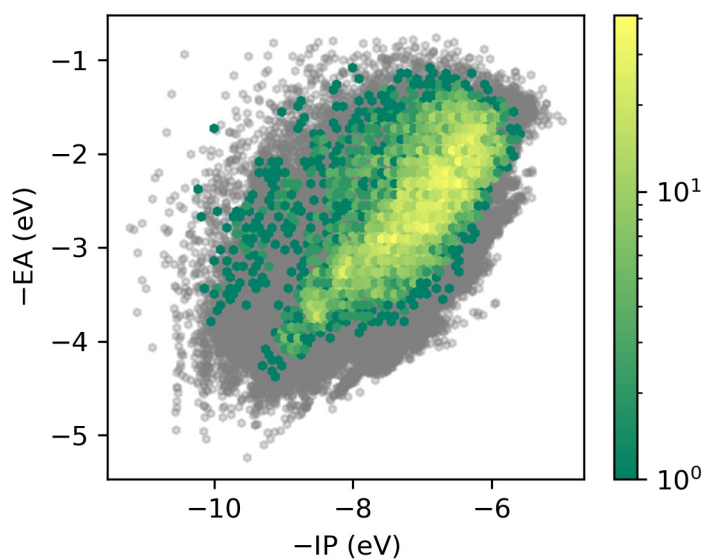

**Supplementary Fig. 42** 2D histogram of the property space spanned by -IP and -EA for molecules containing [s](:[cH]):[c].

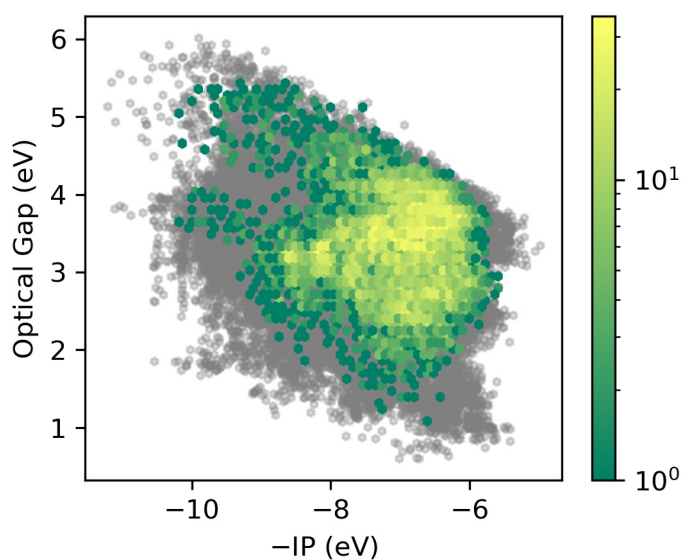

**Supplementary Fig. 43** 2D histogram of the property space spanned by -IP and the optical gap for molecules containing [s](:[cH]):[c].

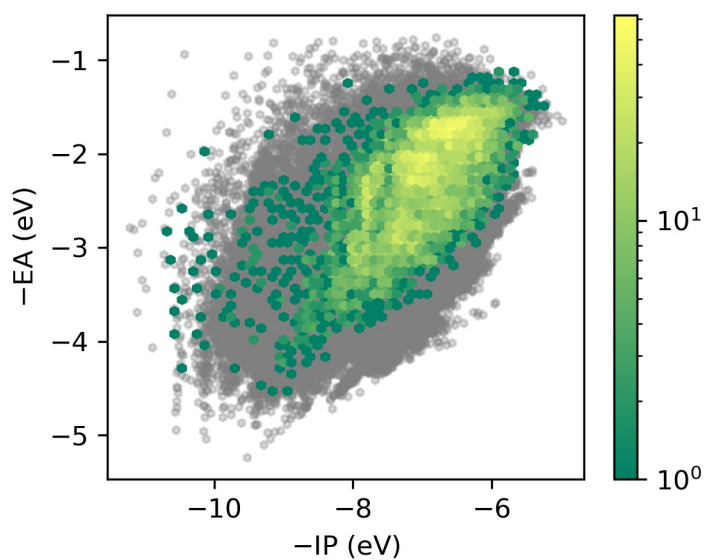

**Supplementary Fig. 44** 2D histogram of the property space spanned by -IP and -EA for molecules containing [s](:[c]):[c].

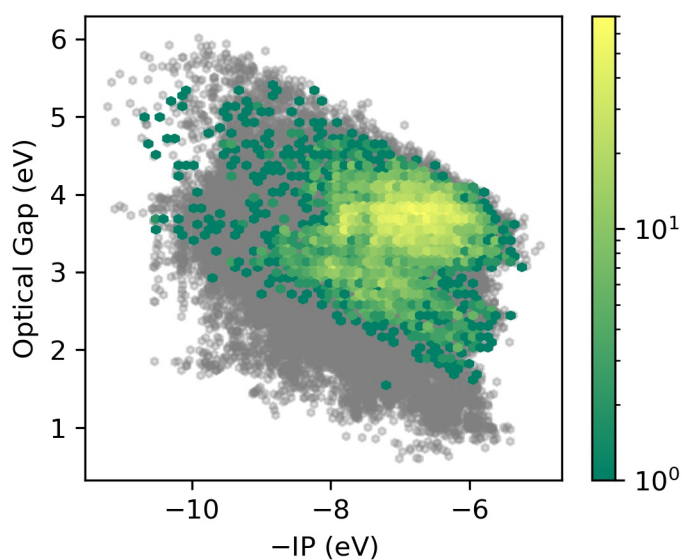

**Supplementary Fig. 45** 2D histogram of the property space spanned by -IP and the optical gap for molecules containing [s](:[c]):[c].



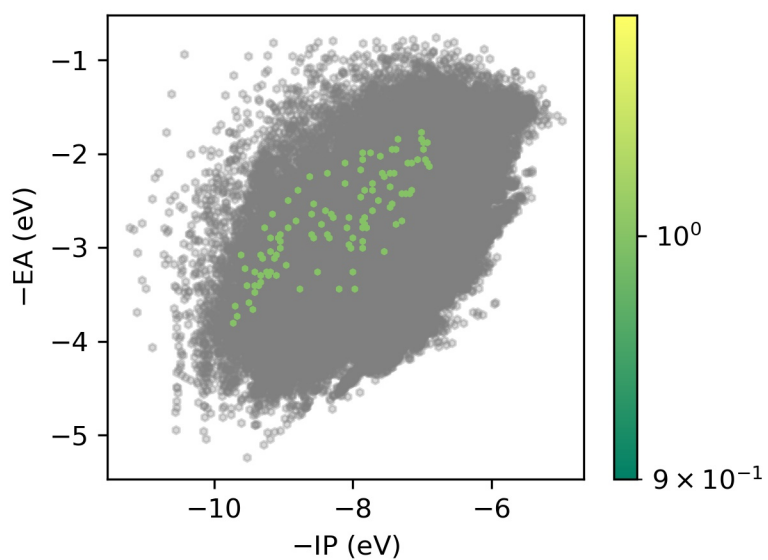

**Supplementary Fig. 46** 2D histogram of the property space spanned by -IP and -EA for molecules containing [S](-[CH])(-[CH])(=[O])=[O].

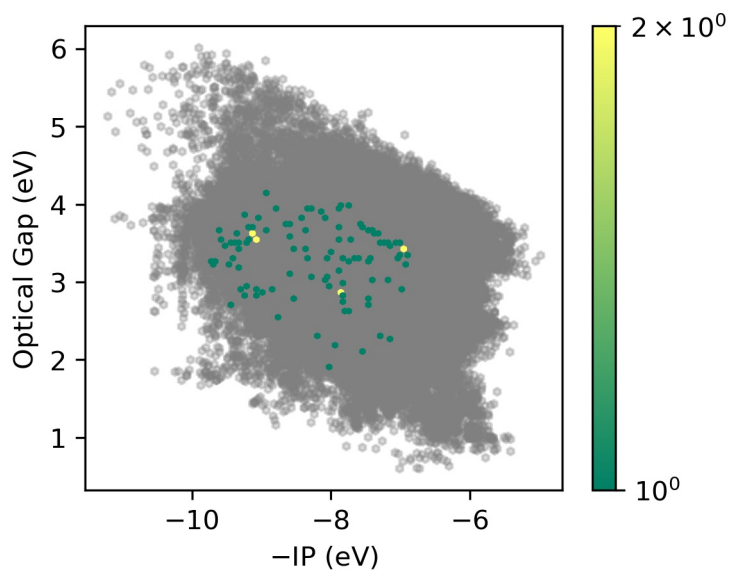

**Supplementary Fig. 47** 2D histogram of the property space spanned by -IP and the optical gap for molecules containing [S](-[CH])(-[CH])(=[O])=[O].

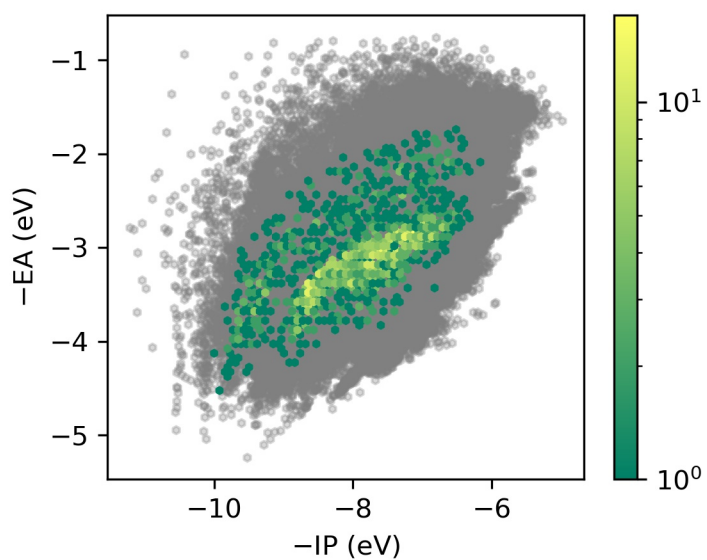

**Supplementary Fig. 48** 2D histogram of the property space spanned by -IP and -EA for molecules containing [S](-[CH])(-[C])(=[O])=[O].

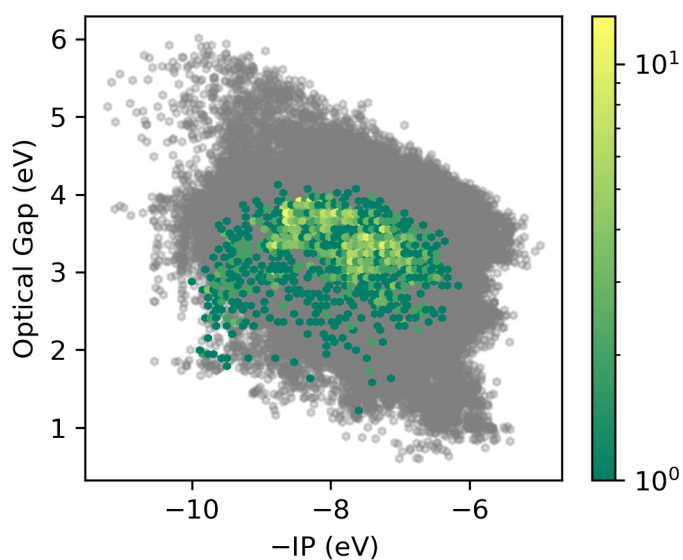

**Supplementary Fig. 49** 2D histogram of the property space spanned by -IP and the optical gap for molecules containing [S](-[CH])(-[C])(=[O])=[O].

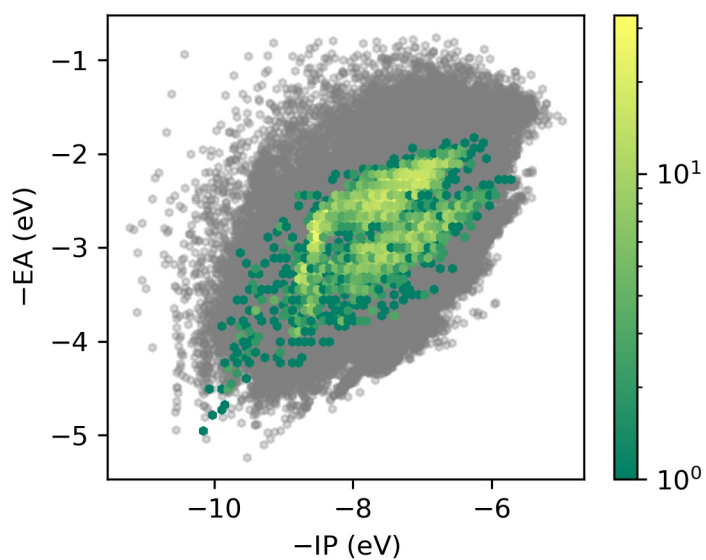

**Supplementary Fig. 50** 2D histogram of the property space spanned by -IP and -EA for molecules containing [S](-[C])(-[C])(=[O])=[O].

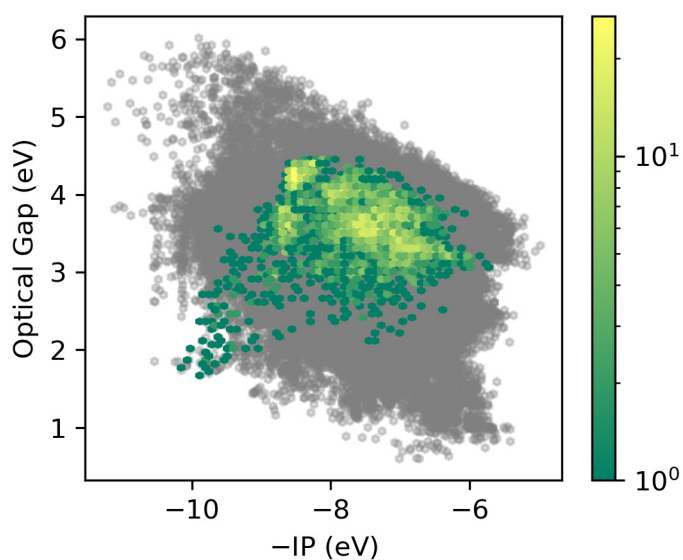

**Supplementary Fig. 51** 2D histogram of the property space spanned by -IP and the optical gap for molecules containing [S](-[C])(-[C])(=[O])=[O].

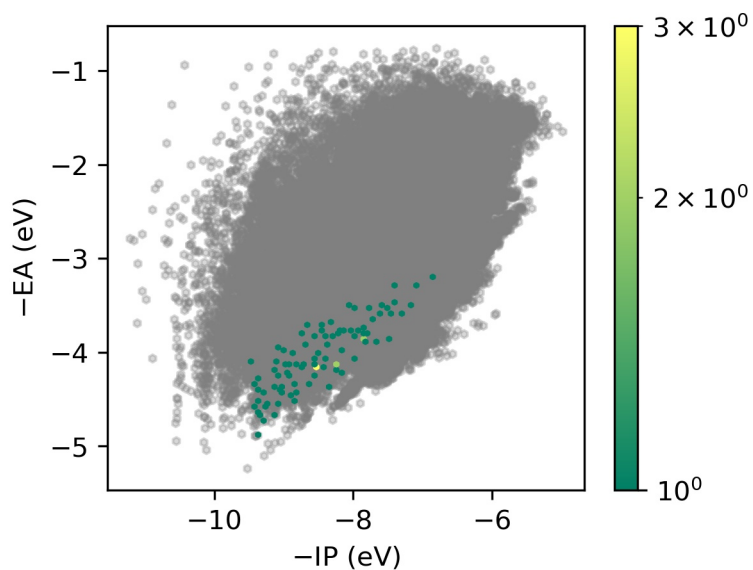

**Supplementary Fig. 52** 2D histogram of the property space spanned by -IP and -EA for molecules containing  $[C](-[CH])(-[CH])=[O]$  or  $[C](-[cH])(-[cH])=[O]$ .

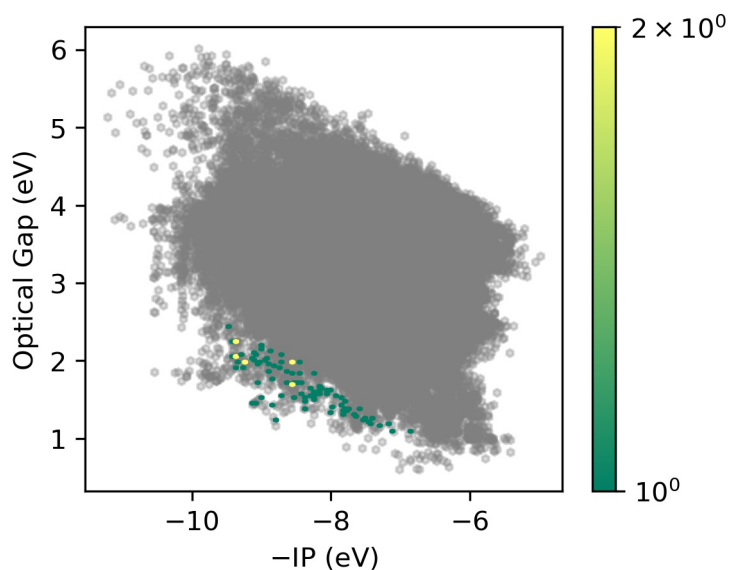

**Supplementary Fig. 53** 2D histogram of the property space spanned by -IP and the optical gap for molecules containing  $[C](-[CH])(-[CH])=[O]$  or  $[C](-[cH])(-[cH])=[O]$ .

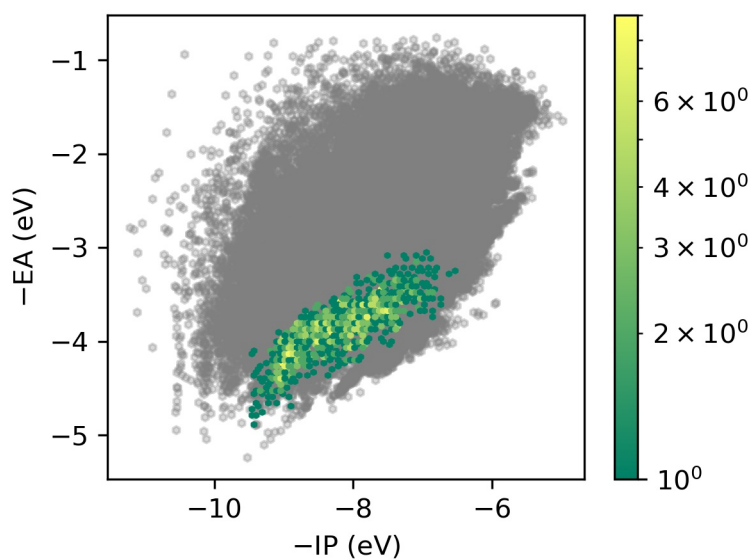

**Supplementary Fig. 54** 2D histogram of the property space spanned by -IP and -EA for molecules containing  $[C](-[CH])(-[C])=[O]$  or  $[C](-[cH])(-[c])=[O]$ .

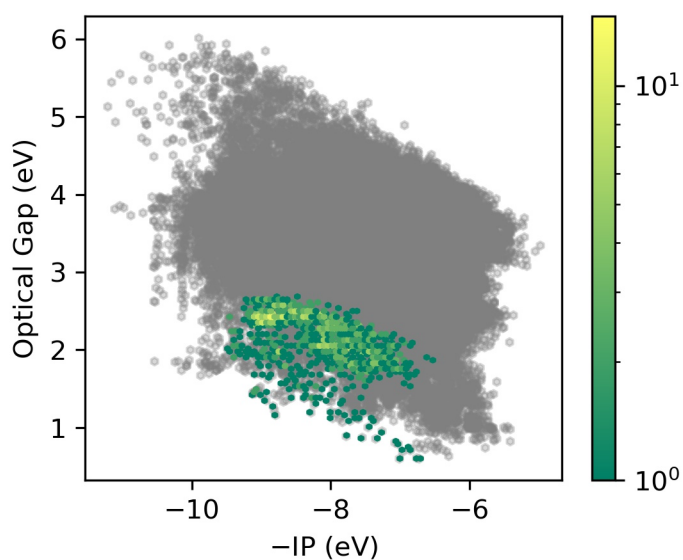

**Supplementary Fig. 55** 2D histogram of the property space spanned by -IP and the optical gap for molecules containing  $[C](-[CH])(-[C])=[O]$  or  $[C](-[cH])(-[c])=[O]$ .

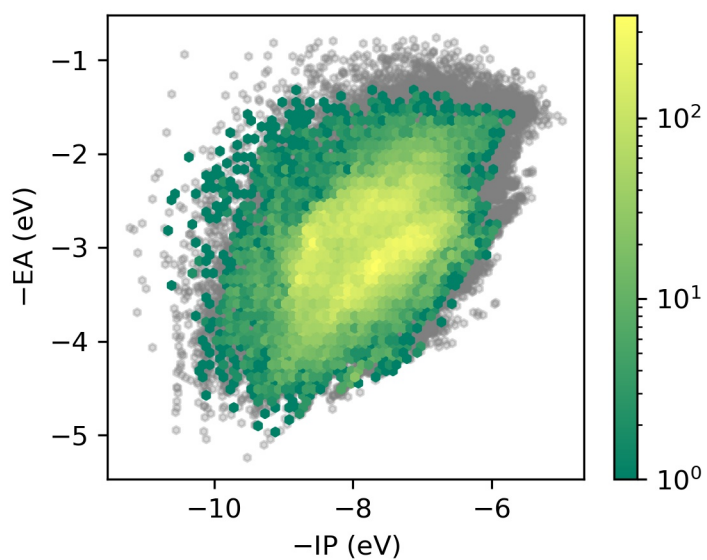

**Supplementary Fig. 56** 2D histogram of the property space spanned by -IP and -EA for molecules containing  $[C](-[C])(-[C])=[O]$  or  $[C](-[c])(-[c])=[O]$ .

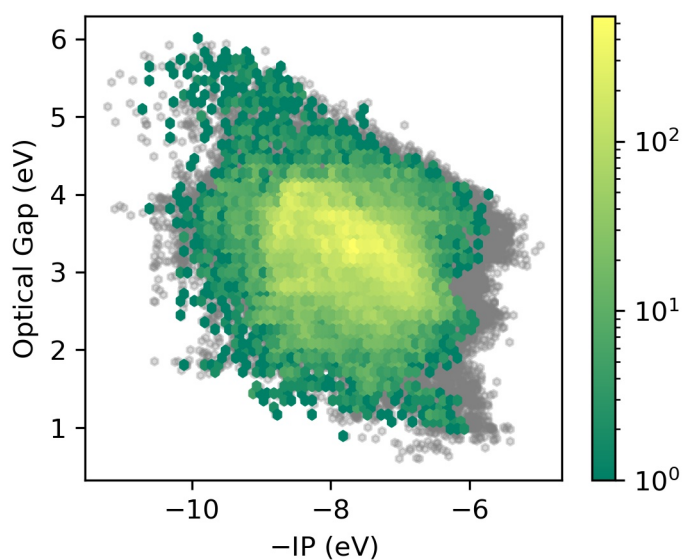

**Supplementary Fig. 57** 2D histogram of the property space spanned by -IP and the optical gap for molecules containing  $[C](-[C])(-[C])=[O]$  or  $[C](-[c])(-[c])=[O]$ .

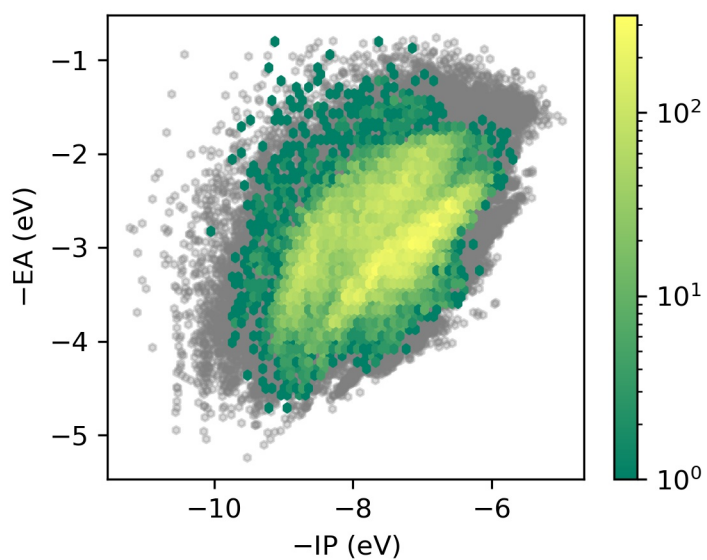

**Supplementary Fig. 58** 2D histogram of the property space spanned by -IP and -EA for molecules containing  $[n](:[cH]):[cH]$ .

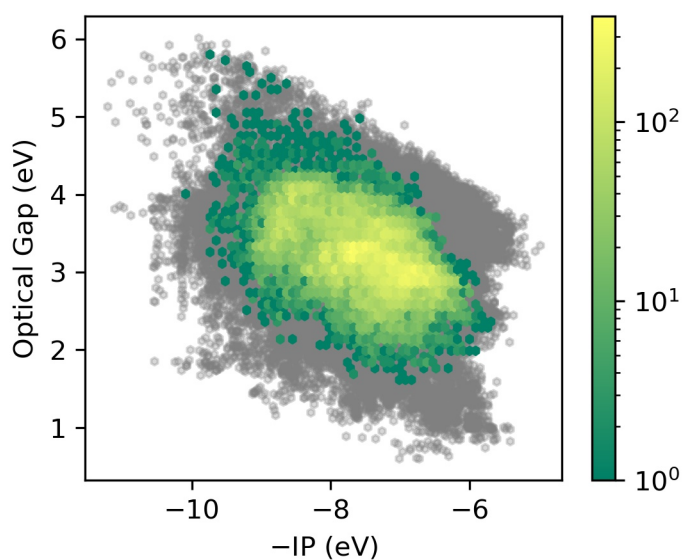

**Supplementary Fig. 59** 2D histogram of the property space spanned by -IP and the optical gap for molecules containing  $[n](:[cH]):[cH]$ .

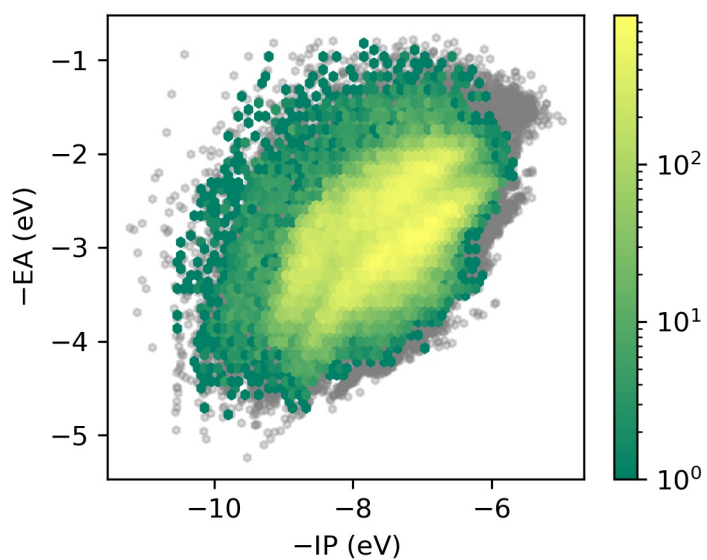

**Supplementary Fig. 60** 2D histogram of the property space spanned by -IP and -EA for molecules containing  $[n](:[cH]):[c]$ .

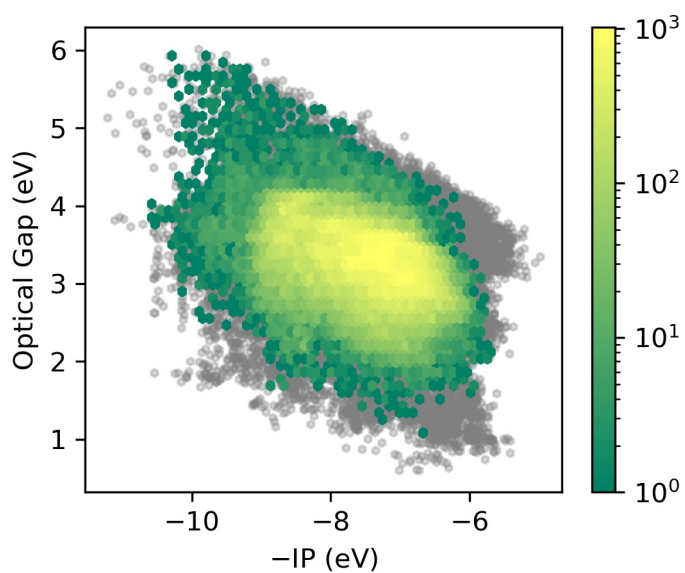

**Supplementary Fig. 61** 2D histogram of the property space spanned by -IP and the optical gap for molecules containing  $[n](:[cH]):[c]$ .



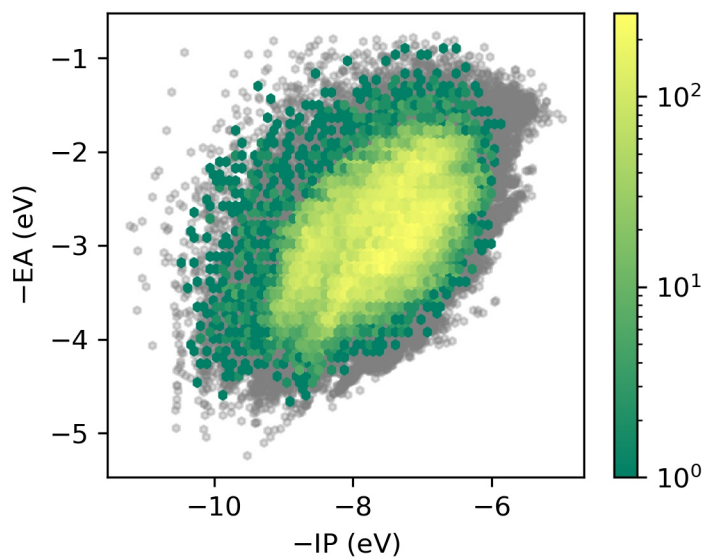

**Supplementary Fig. 62** 2D histogram of the property space spanned by -IP and -EA for molecules containing  $[n](:[c]):[c]$ .

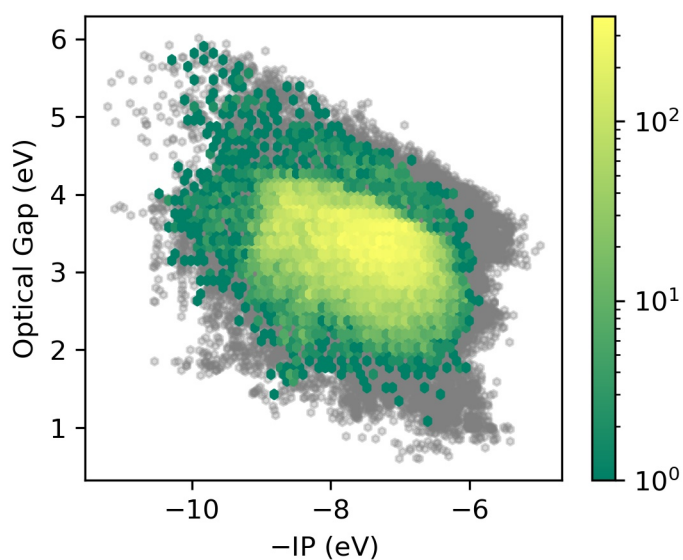

**Supplementary Fig. 63** 2D histogram of the property space spanned by -IP and the optical gap for molecules containing  $[n](:[c]):[c]$ .

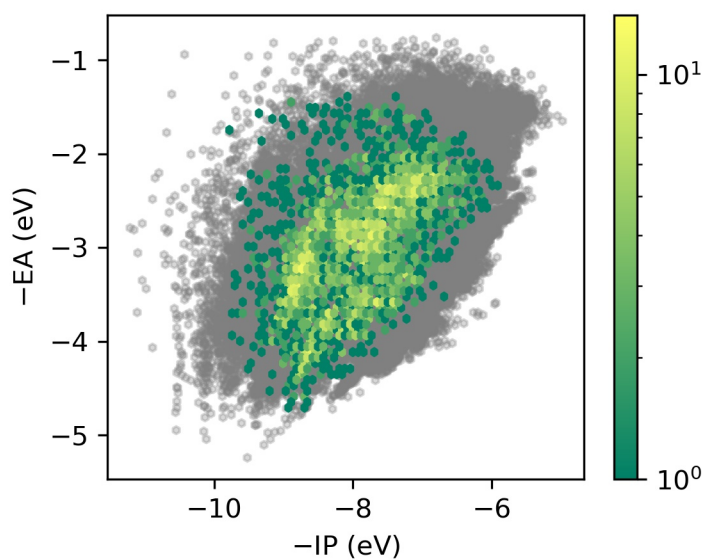

**Supplementary Fig. 64** 2D histogram of the property space spanned by -IP and -EA for molecules containing [n](:[n]):[cH].

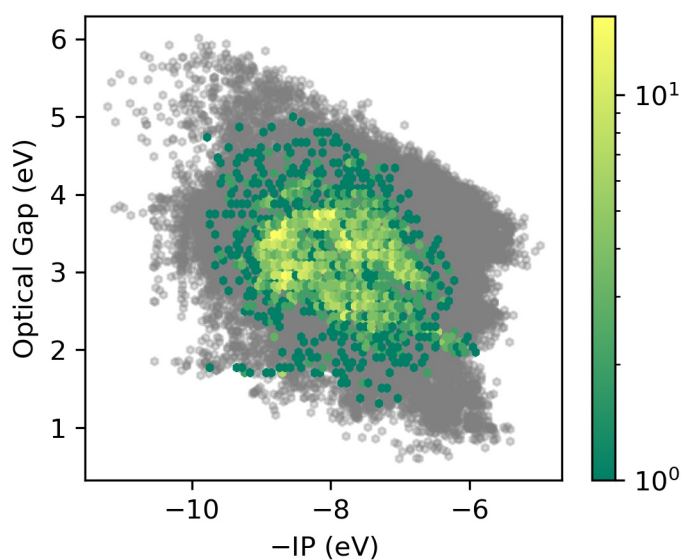

**Supplementary Fig. 65** 2D histogram of the property space spanned by -IP and the optical gap for molecules containing [n](:[n]):[cH].

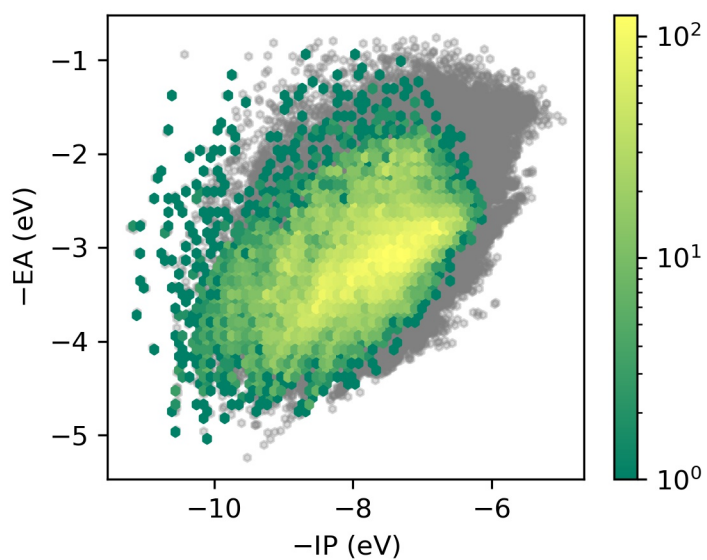

**Supplementary Fig. 66** 2D histogram of the property space spanned by -IP and -EA for molecules containing  $[n](:[n]):[c]$ .

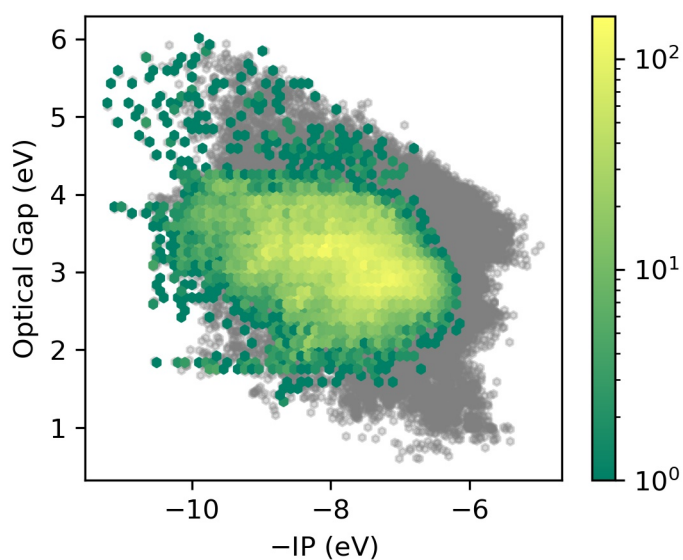

**Supplementary Fig. 67** 2D histogram of the property space spanned by -IP and the optical gap for molecules containing  $[n](:[n]):[c]$ .

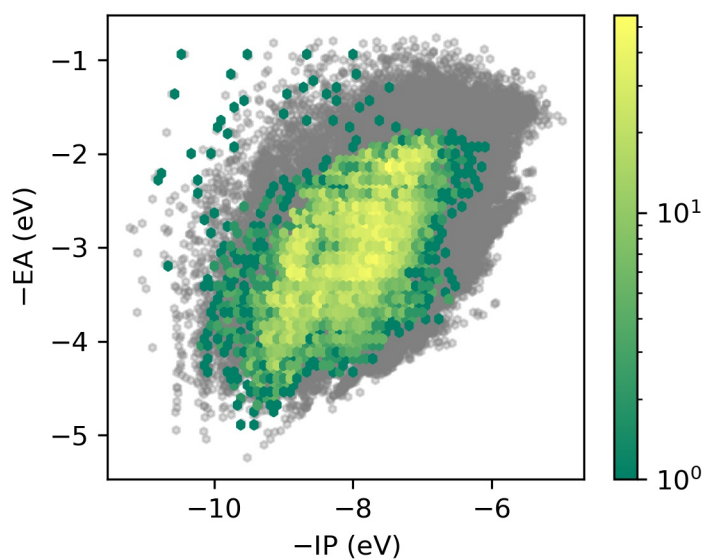

**Supplementary Fig. 68** 2D histogram of the property space spanned by -IP and -EA for molecules containing [cH](:[n]):[n].

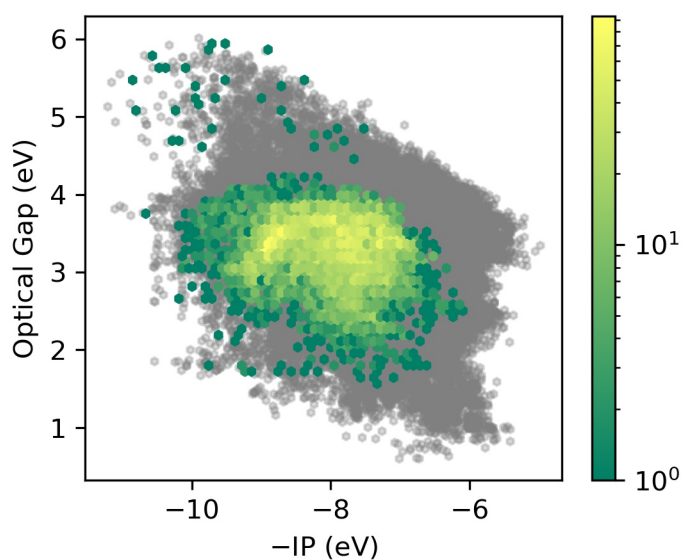

**Supplementary Fig. 69** 2D histogram of the property space spanned by -IP and the optical gap for molecules containing [cH](:[n]):[n].

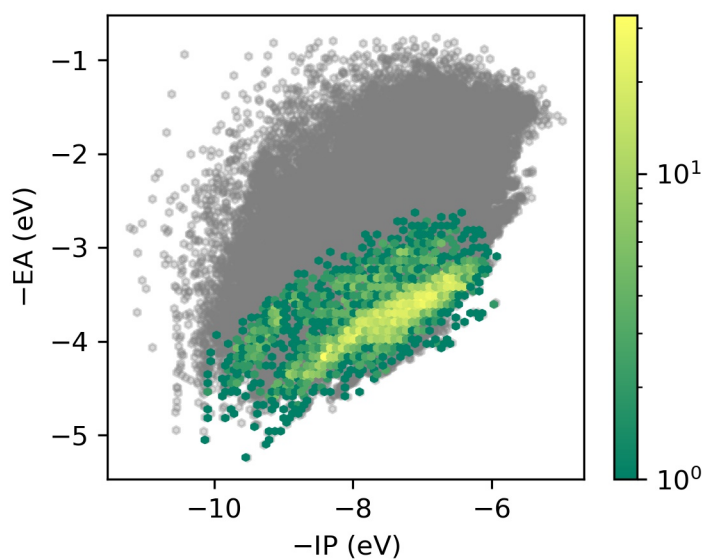

**Supplementary Fig. 70** 2D histogram of the property space spanned by -IP and -EA for molecules containing [s](:[n]):[n].

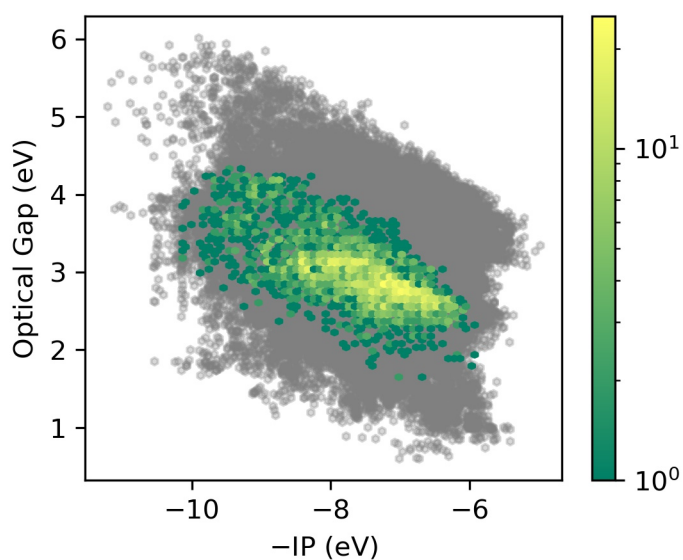

**Supplementary Fig. 71** 2D histogram of the property space spanned by -IP and the optical gap for molecules containing [s](:[n]):[n].

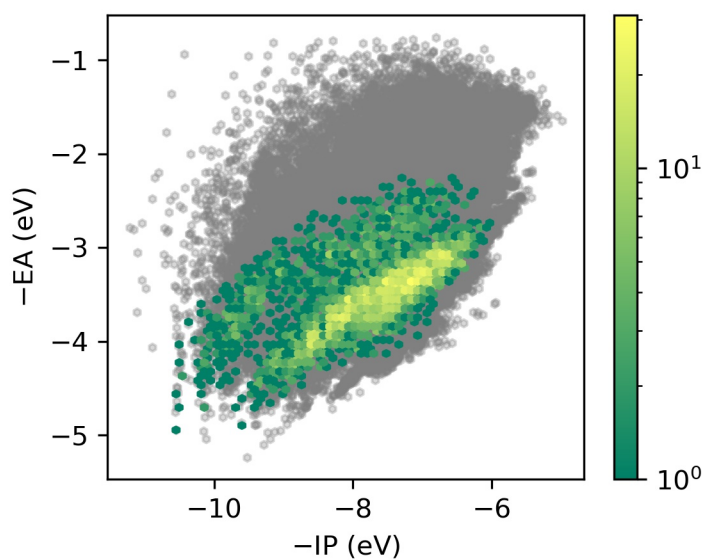

**Supplementary Fig. 72** 2D histogram of the property space spanned by -IP and -EA for molecules containing [o](:[n]):[n].

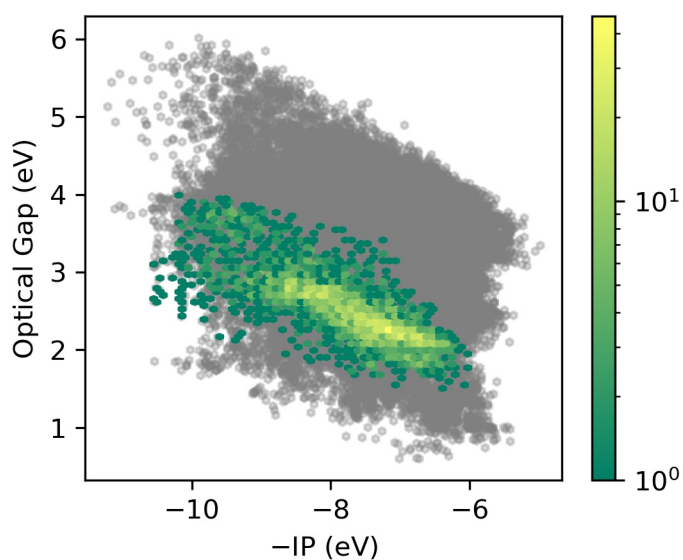

**Supplementary Fig. 73** 2D histogram of the property space spanned by -IP and the optical gap for molecules containing [o](:[n]):[n].

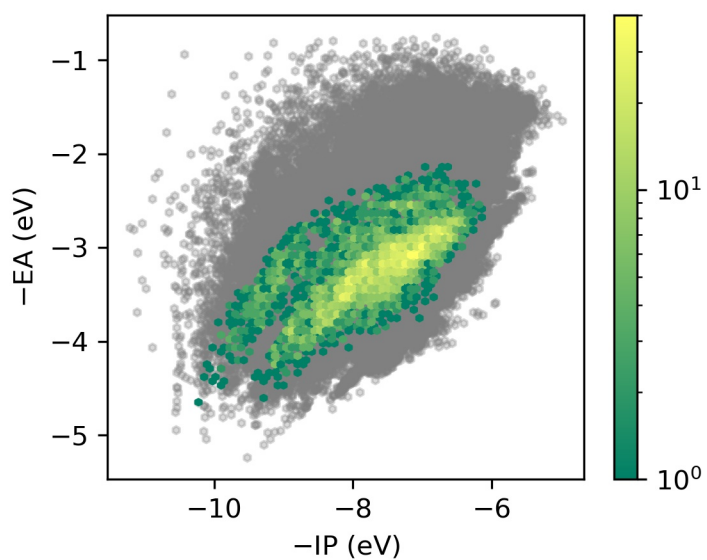

**Supplementary Fig. 74** 2D histogram of the property space spanned by -IP and -EA for molecules containing [n](:[n]):[s].

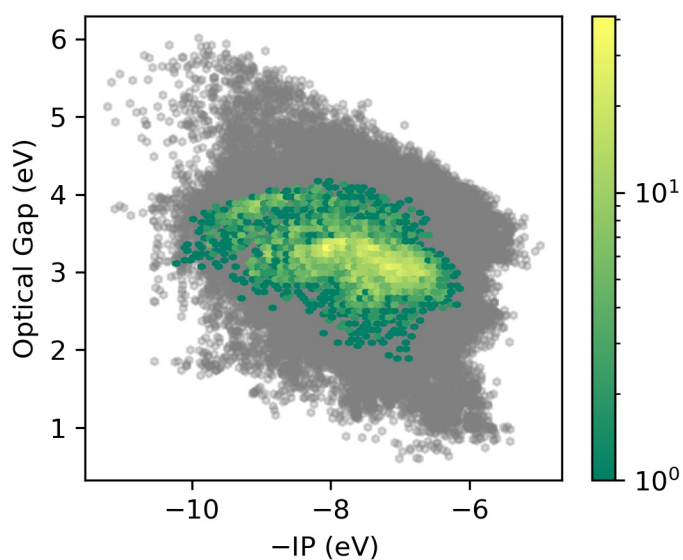

**Supplementary Fig. 75** 2D histogram of the property space spanned by -IP and the optical gap for molecules containing [n](:[n]):[s].

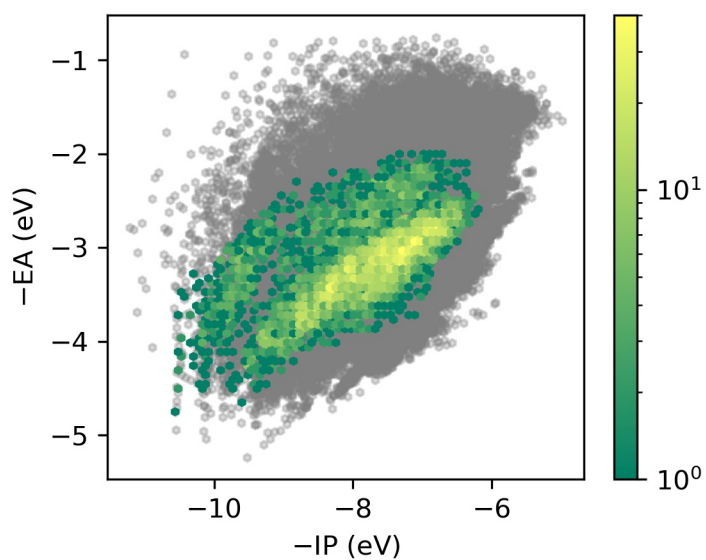

**Supplementary Fig. 76** 2D histogram of the property space spanned by -IP and -EA for molecules containing [n](:[n]):[o].

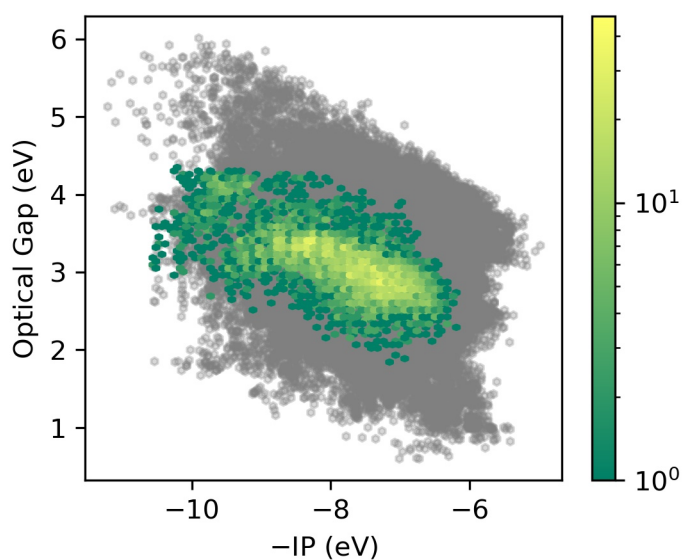

**Supplementary Fig. 77** 2D histogram of the property space spanned by -IP and the optical gap for molecules containing [n](:[n]):[o].



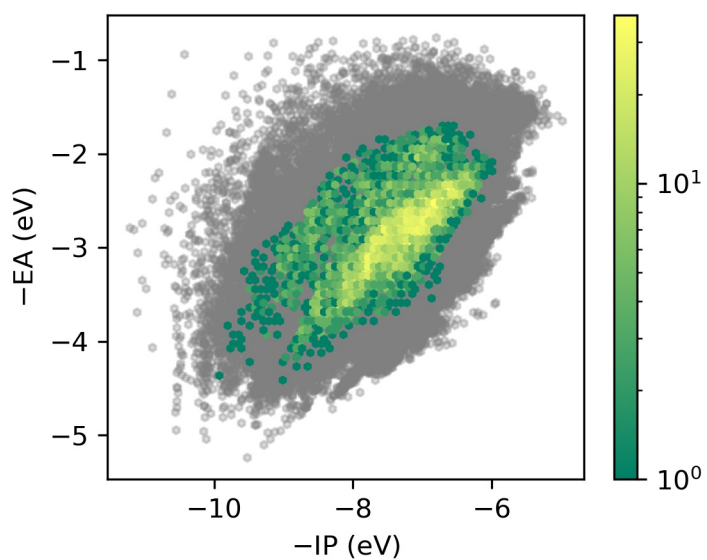

**Supplementary Fig. 78** 2D histogram of the property space spanned by -IP and -EA for molecules containing [n](:[cH]):[s].

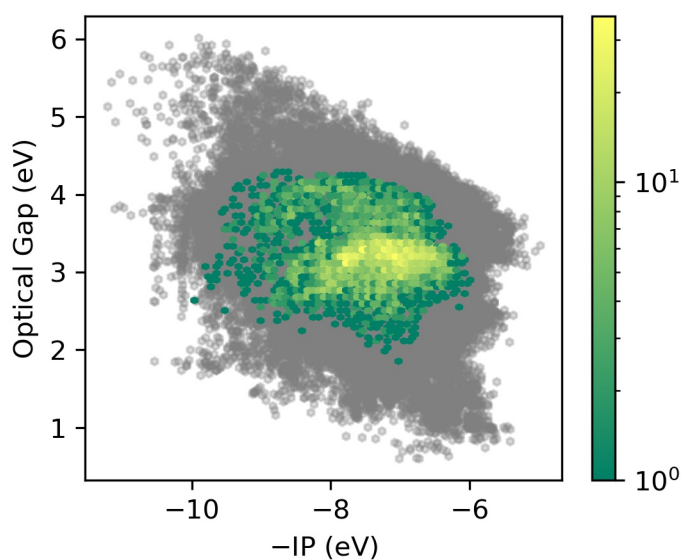

**Supplementary Fig. 79** 2D histogram of the property space spanned by -IP and the optical gap for molecules containing [n](:[cH]):[s].

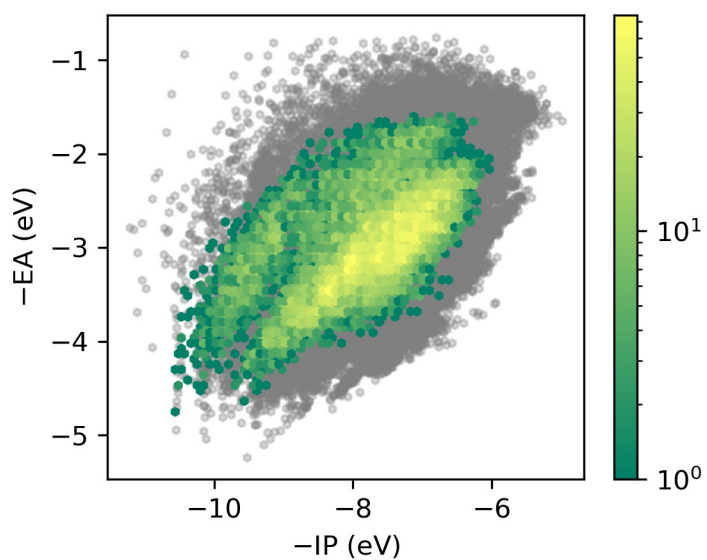

**Supplementary Fig. 80** 2D histogram of the property space spanned by -IP and -EA for molecules containing [n](:[cH]):[o].

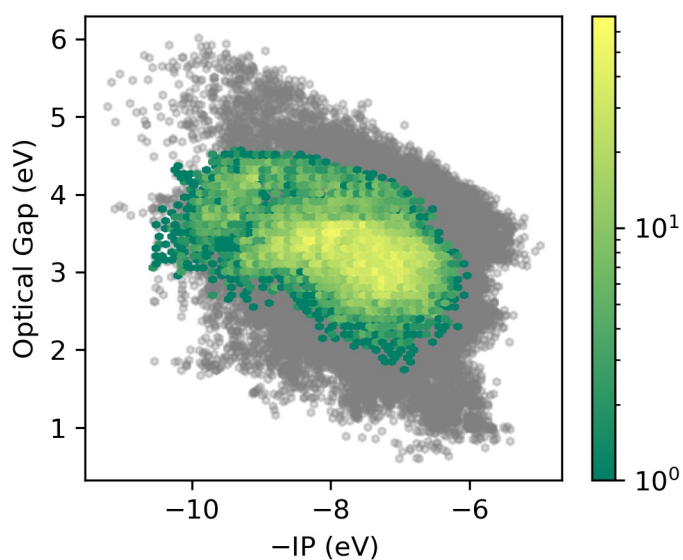

**Supplementary Fig. 81** 2D histogram of the property space spanned by -IP and the optical gap for molecules containing [n](:[cH]):[o].



**Supplementary Fig. 82** 2D histogram of the property space spanned by -IP and -EA for molecules containing [cH](:[s]):[n].



**Supplementary Fig. 83** 2D histogram of the property space spanned by -IP and the optical gap for molecules containing [cH](:[s]):[n].

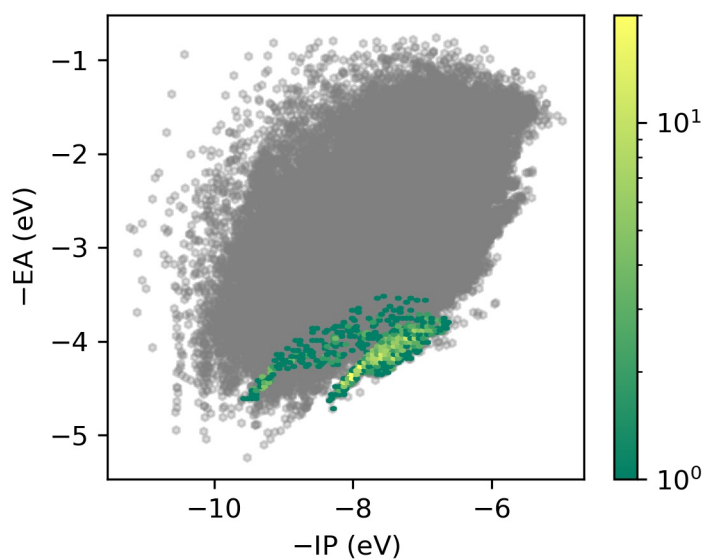

**Supplementary Fig. 84** 2D histogram of the property space spanned by -IP and -EA for molecules containing ([n](:[c])(:[c])-[CH3]).

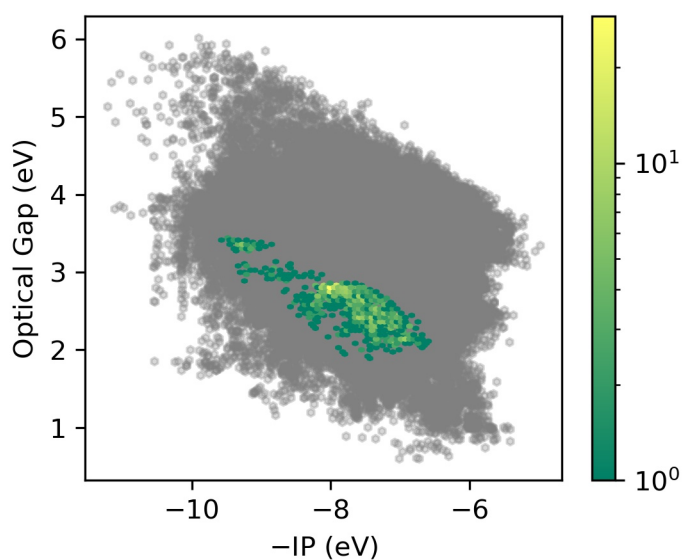

**Supplementary Fig. 85** 2D histogram of the property space spanned by -IP and the optical gap for molecules containing ([n](:[c])(:[c])-[CH3]).

## Supplementary tables

**Supplementary Table 1** Parameters of the linear model used to convert xTB values to the DFT scale, the corresponding coefficient of determination ( $r^2$ ) and the mean average error (MAE).

|             | slope | intercept | $r^2$ | MAE  |
|-------------|-------|-----------|-------|------|
| -IP         | 1.076 | 0.151     | 0.888 | 0.20 |
| -EA         | 0.821 | 0.616     | 0.957 | 0.12 |
| optical gap | 0.925 | 0.110     | 0.862 | 0.21 |

**Supplementary Table 2** Prevalent skeletons identified through the topographical analysis and their corresponding -IP/-EA regions.

| Most Prevalent Skeleton SMILES                                 | -IP min | -IP max | -EA min | -EA max |
|----------------------------------------------------------------|---------|---------|---------|---------|
| c1ncc2nsc12                                                    | -inf    | -3.5    | -inf    | -3.5    |
| c1ncc2oncc12                                                   | -inf    | -3.5    | -3.5    | -2.5    |
| c1ncco1                                                        | -inf    | -3.5    | -2.5    | -1.5    |
| c1nc2ccc3ncnc4ccc(n1)c2c34                                     | -3.5    | -2.5    | -inf    | -3.5    |
| c1cnc2ncccc2c1                                                 | -3.5    | -2.5    | -3.5    | -2.5    |
| c1cncnc1                                                       | -3.5    | -2.5    | -2.5    | -1.5    |
| Cn1c(=O)c2ccc3c4ccc5c(=O)n(C)c(=O)c6ccc(c7ccc(c1=O)c2c37)c4c56 | -2.5    | -1.5    | -inf    | -3.5    |
| c1nnc2cc3sncc3cc12                                             | -2.5    | -1.5    | -3.5    | -2.5    |
| c1ccc2c(c1)Cc1ccccc1-2                                         | -2.5    | -1.5    | -2.5    | -1.5    |
| c1nnc[nH]1                                                     | -2.5    | -1.5    | -1.5    | -0.5    |
| c1c2c(cc3nsc13)N=S=N2                                          | -1.5    | -0.5    | -inf    | -3.5    |
| c1ccc2cc3cc4cccc4cc3cc2c1                                      | -1.5    | -0.5    | -3.5    | -2.5    |
| c1cc2cc3sccc3cc2s1                                             | -1.5    | -0.5    | -2.5    | -1.5    |
| c1cc[nH]c1                                                     | -1.5    | -0.5    | -1.5    | -0.5    |
| c1cc2[nH]c3cc[nH]c3c2[nH]1                                     | -0.5    | inf     | -2.5    | -1.5    |
| c1cc2sc3cc[nH]c3c2[nH]1                                        | -0.5    | inf     | -1.5    | -0.5    |

## Supplementary methods

### SMILES fragment notation

In the main text we present these fragments as SMILES strings written in a condensed form, e.g. [cH][nH][cH], but with explicit hydrogen atoms, where the central atom of the fragment occurs in the middle of the string. The explicit hydrogen atoms are important as [cH][nH]c and c[nH]c, fragments where one or both carbon atoms besides the pyrrolic nitrogen have a substituent, are classed based on the radius 1 Morgan Extended-connectivity fingerprints as different fragments than [cH][nH][cH], as well as each other. Atoms that form part of an aromatic ring are shown in lowercase and aliphatic carbons in uppercase. However, the Morgan fingerprinting algorithm with radius 1 classifies the cC(=O)c fragment of anthraquinone and the CC(=O)C fragment of a benzoquinone molecule were both carbons adjacent to the central carbonyl group have been functionalised as the same fragment.

In the supporting figures we use in the captions of Figs. S28-S85 the long form of the SMILES with the central atom of the fragment on the right, e.g. [nH](:[nH]):[nH], where additionally single (-) and aromatic (:) bonds are explicitly shown.
